1 *Mutator* transposon insertions within maize genes often provide a novel outward reading  
2 promoter

3

4 **Authors:**

5 Erika L. Ellison<sup>1</sup>, Peng Zhou<sup>1</sup>, Peter Hermanson<sup>1</sup>, Yi-Hsuan Chu<sup>2</sup>, Andrew Read<sup>1,3</sup>, Candice N.  
6 Hirsch<sup>3</sup>, Erich Grotewold<sup>2</sup>, Nathan M. Springer<sup>1\*</sup>

7

8

9 **Author affiliations:**

10 <sup>1</sup>Department of Plant and Microbial Biology, University of Minnesota, Saint Paul, MN 55108

11 <sup>2</sup>Department of Biochemistry and Molecular Biology, Michigan State University, East Lansing,  
12 Michigan 48824

13 <sup>3</sup>Department of Agronomy and Plant Genetics, University of Minnesota, Saint Paul, MN 55108

14 \*Corresponding author: [springer@umn.edu](mailto:springer@umn.edu)

15

16

17 **Running head:**

18 Complex transcripts from Mu insertions within genes

19

20 **Keywords:**

21 Mutator, maize, transposable elements

22

23 **ORCID:** ELE 0000-0001-7868-6215, PZ 0000-0001-5684-2256, NMS 0000-0002-7301-4759,  
24 EG 0000-0002-4720-7290, YHC 0000-0002-3809-4933, AR 0000-0003-1789-6571, CNH 0000-  
25 0002-8833-3023, PH 0000-0002-4941-3311

26

27

28

29

## 30 **Abstract**

31 The highly active family of *Mutator* (*Mu*) DNA transposons has been widely used for forward and  
32 reverse genetics in maize. There are examples of *Mu*-suppressible alleles which result in  
33 conditional phenotypic effects based on the activity of *Mu*. Phenotypes from these *Mu*-  
34 suppressible mutations are observed in *Mu*-active genetic backgrounds, but absent when *Mu*  
35 activity is lost. For some *Mu*-suppressible alleles, phenotypic suppression likely results from an  
36 outward-reading promoter within *Mu* that is only active when the autonomous *Mu* element is  
37 silenced or lost. We isolated 35 *Mu* alleles from the UniformMu population that represent  
38 insertions in 24 different genes. Most of these mutant alleles are due to insertions within gene  
39 coding sequences, but several 5' UTR and intron insertions were included. RNA-seq and *de*  
40 *novo* transcript assembly were utilized to document the transcripts produced from 33 of these  
41 *Mu* insertion alleles. For 20 of the 33 alleles, there was evidence of transcripts initiating within  
42 the *Mu* sequence reading through the gene. This outward-reading promoter activity was  
43 detected in multiple types of *Mu* elements and doesn't depend on the orientation of *Mu*.  
44 Expression analyses of *Mu*-initiated transcripts revealed the *Mu* promoter often provides gene  
45 expression levels and patterns that are similar to the wild-type gene. These results suggest the  
46 *Mu* promoter may represent a minimal promoter that can respond to gene *cis*-regulatory  
47 elements. Findings from this study have implications for maize researchers using the  
48 UniformMu population, and more broadly highlights a strategy for transposons to co-exist with  
49 their host.

50

## 51 **Article Summary:**

52 *Mutator* (*Mu*) transposable elements are a widely used tool for insertional mutagenesis in maize  
53 and often insert in the 5' regions of genes. The characterization of transcripts for *Mu* insertion  
54 alleles reveals complex transcripts. These often result in one transcript that covers the first  
55 portion of the gene terminating in *Mu* and a second transcript initiating within *Mu* covering the  
56 latter portion of the gene. This may reflect a strategy for *Mu* to minimize the consequences of  
57 insertions within genes.

58

## 59 **Introduction**

60

61 Transposon insertion stocks have been developed and successfully used to study gene function  
62 in several organisms, including plants (Parinov and Sundaresan 2000; Brutnell 2002;  
63 Østergaard and Yanofsky 2004; Tadege *et al.* 2005), invertebrate animal models (Cooley *et al.*  
64 1988; Bessereau *et al.* 2001; Thibault *et al.* 2004; Bessereau 2006), bacteria (Cain *et al.* 2020),  
65 and a variety of single-cell eukaryotes (Guo *et al.* 2013; Michel *et al.* 2017). Across species, the  
66 applicability of these transposon stocks vary due to properties of the transposon/transposase  
67 and the target genome, including sufficient transpositional activity, endogenous transposon copy  
68 number, transposon element type, family and size, integration site preference, and chromatin  
69 landscape of the genome (Ivics *et al.* 2009). In maize, there are two widely utilized DNA  
70 transposon families with sequence-indexed libraries: *Activator/Dissociation* (*Ac/Ds*) (Brutnell  
71 and Conrad 2003; Vollbrecht *et al.* 2010) and *Mutator* (*Mu*) (McCarty *et al.* 2005). Multiple *Mu*  
72 transposon populations have been generated in maize, including UniformMu (McCarty *et al.*  
73 2005), BonnMu (Marcon *et al.* 2020), Mu-Illumina (Williams-Carrier *et al.* 2010), Pioneer Hi-Bred

74 International's Trait Utility System for Corn (TUSC) (Briggs and Meeley 1995; Bensen *et al.*  
75 1995), and Maize-Targeted Mutagenesis population (MTM) (May *et al.* 2003). Both *Mu* and *Ds*  
76 elements preferentially transpose into low copy sequences or genic regions which is useful for  
77 mutagenesis (Bennetzen and Springer 1994; Rabinowicz *et al.* 1999; Hanley *et al.* 2000;  
78 Fernandes *et al.* 2004; McCarty *et al.* 2005). The utility of *Ac/Ds* stocks for mutagenesis is  
79 somewhat limited due to low copy number, low germinal insertion frequency, and the tendency  
80 for new copies to insert into sites genetically linked to the donor loci (Vollbrecht *et al.* 2010). By  
81 contrast, *Mu* stocks are more widely used for reverse genetics because *Mu* has a high germinal  
82 insertion frequency, high forward mutation rate, and frequently inserts into genic regions that are  
83 unlinked to the donor loci (Lisch *et al.* 1995; Cresse *et al.* 1995; Settles *et al.* 2004; Fernandes  
84 *et al.* 2004; McCarty *et al.* 2005; Vollbrecht *et al.* 2010).

85  
86 *Mu* transposable elements are the most mutagenic plant transposons known, due to their high  
87 transposition frequency and tendency to insert into low copy sequences or genic regions  
88 (Cresse *et al.* 1995; Lisch 2002; Settles *et al.* 2004; Fernandes *et al.* 2004; McCarty *et al.* 2005).  
89 The original *Mu* element was first described in maize in 1978 by Donald Robertson (Robertson  
90 1978, 1983). Robertson identified a maize line with what he called "mutator" activity that had a  
91 very high forward mutation rate, 50- to 100-fold greater than that of the background. Upon  
92 outcrossing mutator plants to non-mutator plants, 90% of the progeny retained the high mutation  
93 frequency, which suggested there is non-Mendelian inheritance of "mutator" activity. It is now  
94 known that *Mu* transposons were responsible for the mutations in Robertson's lines (Strommer  
95 *et al.* 1982; Bennetzen 1984; Taylor and Walbot 1987; Fedoroff and Chandler 1994; Lisch and  
96 Jiang 2015). There is evidence that *Mu* elements in maize can reach high copy numbers  
97 because they can transpose at frequencies nearing 100% (Alleman and Freeling 1986; Walbot  
98 and Rudenko 2002), have a high germline mutation rate, and are rarely excised from the  
99 germline (excision rate < 10<sup>-4</sup>) (Schnable and Peterson 1988; Levy *et al.* 1989; Brown *et al.*  
100 1989; Walbot 1991; Levy and Walbot 1991; Bennetzen 1996).

101  
102 The *Mutator* system is a two-component system with one autonomous element, *MuDR*, and  
103 several non-autonomous elements (*Mu1* to *Mu13*) (Lisch 2002; Tan *et al.* 2011). Non-  
104 autonomous *Mu* elements all contain similar ~220 bp terminal inverted repeats (TIRs), but each  
105 class of element has unique internal sequences (Chandler and Hardeman 1992; Lisch and  
106 Jiang 2015). *Mutator* activity is dependent on the presence of an active autonomous *MuDR*  
107 element to encode the proteins necessary for transposition of itself and non-autonomous  
108 elements (Chomet *et al.* 1991b; Hershberger *et al.* 1991). *Mu*, like *Ds*, preferentially inserts into  
109 gene rich regions; however, *Mu* exhibits a stronger preference than *Ds* for 5' UTR or promoter  
110 regions (Dietrich *et al.* 2002; Vollbrecht *et al.* 2010). These genic regions where *Mu* lands have  
111 distinct chromatin, DNA methylation, and recombination activity that could influence *Mu* element  
112 targeting (Bennetzen 2000; Lisch and Jiang 2015). *Mutator* activity can be epigenetically  
113 regulated, such that some plants with *MuDR* are in fact *Mu*-inactive due to heterochromatin-  
114 mediated silencing of the *MuDR* coding sequences, which is accompanied by high levels of  
115 DNA methylation (Chandler and Walbot 1986; Chomet *et al.* 1991b; McCarty *et al.* 2005). In  
116 plants containing epigenetically silenced *MuDR* the non-autonomous *Mu* elements do not  
117 exhibit evidence for transposition and are methylated in the *Mu*-inactive state. In the *Mu*-active

118 state, the autonomous and non-autonomous *Mu* elements are hypomethylated and products  
119 from *MuDR* can mobilize *Mu* elements (Lisch *et al.* 1995; Hershberger *et al.* 1995). To develop  
120 Uniform*Mu* populations in maize that are genetically stable (in *Mu*-inactive genetic backgrounds)  
121 new germinal *Mu* insertions from lines with *MuDR* activity (*Mu*-active) are stabilized by selecting  
122 against somatic transposition of *Mu* using the *bronze1-mum9* (*bz1-mum9*) mutation as a genetic  
123 marker for *MuDR* activity (Brown *et al.* 1989; Brown and Sundaesan 1992; McCarty *et al.* 2005,  
124 2013; Settles *et al.* 2007).

125  
126 *Mutator* has been used to mutagenize many genes and isolate loss-of-function alleles (Chen *et*  
127 *al.* 1987; Stinard *et al.* 1993; Greene *et al.* 1994; Dietrich *et al.* 2002; Bortiri *et al.* 2006; Settles  
128 *et al.* 2007). In many cases these *Mu* insertion alleles produce a stable phenotype that does not  
129 change depending upon the epigenetic state of *Mu*. However, there is evidence that the  
130 phenotypic consequences for some of these *Mu*-induced alleles can be suppressed depending  
131 on the state of *Mu*. *Mu*-induced mutations that are suppressible, *Mu*-suppressible alleles, exhibit  
132 a mutant phenotype in *Mu*-active genetic backgrounds that can be suppressed, returning to a  
133 wild-type phenotype, when *Mu* activity is lost (*Mu*-inactive). *Mu*-suppressible alleles were well  
134 characterized in a recessive loss-of-function mutation, *hcf106-mum1*, caused by insertion of  
135 *Mu1* in the promoter of *HCF106*, a gene in maize required for chloroplast membrane biogenesis  
136 (Martienssen *et al.* 1989, 1990; Barkan and Martienssen 1991). Homozygous *hcf106-mum1*  
137 maize seedlings expressed a non-photosynthetic, pale green mutant phenotype only in the  
138 absence of *Mu* activity (*Mu*-inactive) (Martienssen *et al.* 1989, 1990; Barkan and Martienssen  
139 1991; Das and Martienssen 1995). It was found that in *Mu*-inactive stocks an outward-reading  
140 promoter near the termini of *Mu* can direct transcription outward into the adjacent gene and  
141 substitute for the *HCF106* promoter (Barkan and Martienssen 1991). Since this discovery  
142 several other *Mu*-suppressible alleles have been described, including *Les28* (Martienssen and  
143 Baron 1994), *a1-mum2* (Chomet *et al.* 1991b; Pooma *et al.* 2002), *rs1* and *Ig3* (Girard and  
144 Freeling 2000), *kn1* (Lowe *et al.* 1992), and *rf2a* (Cui *et al.* 2003). The full extent and molecular  
145 mechanisms of suppressibility of *Mu*-induced mutations have not been characterized widely, but  
146 may be a property of the *Mutator* system (Lisch and Jiang 2015).

147  
148 We sought to further characterize the frequency of promoter activity in *Mu*-induced mutations  
149 and properties influencing the promoter's ability to direct transcription outward has not been  
150 previously reported. Here we characterized the transcripts of 33 *Mu* insertion alleles. We find  
151 evidence that many (n = 20) of these alleles result in the production of two transcripts: one  
152 initiating at the wild-type gene transcription start site (TSS) and another initiating from a *Mu*  
153 outward-reading promoter. This *Mu* outward-reading promoter appears to be functional in  
154 several of the non-autonomous *Mu* elements and is not dependent upon *Mu* orientation.  
155 Interestingly, our findings suggest that the *Mu* promoter is a minimal promoter that often shows  
156 expression levels and patterns quite similar to the gene it is inserted within. These findings  
157 highlight a potential strategy for co-evolutionary interactions between transposons and their host  
158 genomes.

159

## 160 **Results**

### 161 **Characterization of transcripts arising from genes with *Mutator* insertions**

162 To investigate the effect of *Mutator* (*Mu*) insertions on transcript structure, we isolated  
163 homozygous mutants for 35 insertions in 24 genes (McCarty *et al.* 2005, 2013). These included  
164 8 insertions in 5' UTR sequence, 22 insertions in coding regions, and 5 insertions in introns  
165 (Figure 1, Table S1). These frequencies do not necessarily reflect the spectrum of insertion  
166 sites for all *Mu* elements. We focused on selection of insertions within coding sequences as the  
167 mutants were originally selected as putative loss-of-function alleles for maize transcription  
168 factors. We generated RNA-seq data for three biological replicates of each homozygous mutant  
169 and wild-type allele. A single tissue for each mutant allele was selected to generate RNA-seq  
170 data based on evidence of wild-type allele expression (Table S2). The expression level of the  
171 mutant allele was documented by aligning RNA-seq data to the W22 reference genome  
172 (Springer *et al.* 2018) and only 8/35 alleles exhibited significantly lower transcript abundance in  
173 the mutant relative to the wild-type (Table S1). The majority, 25/35, of mutant alleles do not  
174 have any significant change in transcript abundance relative to wild-type, and two alleles have  
175 significantly higher transcript abundance (Table S1). Assessment of the mapped transcript  
176 reads derived from homozygous mutant plants revealed reduced coverage at the site of the *Mu*  
177 insertion (Figure S1). The drop in coverage flanking the *Mu* insertion site is expected if there is a  
178 novel junction and/or sequence present at this region in the mutant allele transcript relative to  
179 the W22 reference genome.

180  
181 There are several potential transcript structures that might be expected to be produced from *Mu*  
182 insertion alleles in comparison to the full-length wild-type W22 gene transcripts (Figure 2A).  
183 Mutant allele transcripts could include: read-through transcription resulting in retention of the full  
184 *Mu* sequence (*Mu* read-through transcript), novel splicing events that include retention of a  
185 portion of the *Mu* sequence (*Mu* spliced transcript), transcript initiation at the wild-type gene  
186 TSS with premature termination in the *Mu* sequence (gene TSS-*Mu* transcript), or transcript  
187 initiation from a *Mu* outward-reading promoter reading through to the wild-type termination site  
188 (*Mu* TSS transcript) (Figure 2A). These potential *Mu* insertion allele transcript structures are not  
189 necessarily mutually exclusive. To determine if *Mu* insertion alleles produced read-through  
190 transcripts with all or a portion of *Mu* sequence retained (*Mu* read-through or *Mu* spliced  
191 transcripts) we performed RT-PCR with gene-specific primers that flank the *Mu* insertion site  
192 (Figure 2B, Table S4). Although we were able to amplify the expected product in wild-type  
193 plants we were not able to detect amplified products in plants homozygous for the *Mu* insertion  
194 for 7 mutant alleles that were tested (see examples in Figure 2C). This suggests that read-  
195 through transcription of the *Mu* insertion with retention of partial or complete *Mu* sequences in  
196 the mRNA is unlikely or rare.

197  
198 To investigate transcript structure of the *Mu* insertion alleles, we generated *de novo* transcript  
199 assemblies for each mutant (35 alleles for 24 genes) and wild-type W22 RNA-seq (5 tissues)  
200 dataset for a total of 40 transcriptome assemblies. The *de novo* transcriptome assemblies for  
201 the W22 control samples generated full-length assemblies for 19 of the 24 genes in the  
202 respective tissue selected to sample for RNA-seq (Data File S1). Four of the remaining five  
203 genes could be assembled as either two (*WRKY8* and *WRKY2*) or three (*HSF24* and *HSF20*)  
204 W22 transcripts due to small gaps in coverage and these genes have lower expression levels,  
205 except for *HSF24* which has moderate expression, but only has 50 bp single-end sequencing

206 which may contribute to the lack of complete assembly for this gene. The other gene, *HSF6*,  
207 lacked adequate coverage to assemble any mutant, *hsf6-m1* and *hsf6-m2*, or control transcripts  
208 and was removed from subsequent analyses. In total, transcript assemblies for 33 mutant  
209 alleles that aligned to the respective wild-type gene with a *Mu* insertion allele (23 genes) were  
210 identified and further characterized (Table S1, Data File S1). The transcripts from the mutant  
211 alleles were classified based on the presence of transcripts arising from the gene that are 5' and  
212 3' of the *Mu* insertion or exclusively 5' or 3' of *Mu* (Figure 3A).

213  
214 For 20 alleles we identified an assembled transcript that matched gene sequences 5' of the *Mu*  
215 insertion site (Figure 3A, Table S1, Data File S1). Many (17) of the 20 mutant alleles with  
216 assembled transcripts that contain gene sequence 5' of *Mu* include at least a portion of *Mu*  
217 sequence at the 3' end of the transcript which indicates the transcript reads into the *Mu* element  
218 and terminates. The 13 alleles (*Mu* TSS; n=7 and gene exon partial; n= 6, Fig. 3A) that did not  
219 have transcripts assembled 5' of *Mu* are enriched for *Mu* insertions very near the 5' end of the  
220 gene (*Mu* insertion sites within the first 33% of gene cDNA). In these cases, it is likely that if a  
221 short transcript (< 200 bp) was produced by the normal gene promoter it would be  
222 underrepresented in the RNA-seq data due to the size selection step during library preparation  
223 (Hirsch *et al.* 2015) and the lack of an assembly could reflect technical bias against short  
224 transcripts rather than absence of this transcript. The majority (31/33) of mutant alleles produce  
225 transcripts downstream (3') of the *Mu* insertion site. Many (21/31) of these transcripts that  
226 include gene sequence downstream of the *Mu* insertion site contain a portion of recognizable  
227 *Mu* sequence at the 5' end of the assembled transcript (Figure 3A, Table S1, Data File S1). The  
228 remaining 10 alleles have partial transcript coverage of gene sequence downstream of the *Mu*  
229 insertion and often (7/10 alleles) have relatively low expression levels (< 5.3 FPKM). Examples  
230 of assembled transcript structures observed for two *Mu* alleles, *jmj13-m4* and *sbp20-m2*,  
231 compared to the W22 allele are shown in Figure 3B. These mutant transcript assemblies  
232 suggest that many of the *Mu* insertions within the coding sequence result in the presence of two  
233 partial transcripts: a transcript initiating at the the gene TSS and terminating within *Mu* (gene  
234 TSS-*Mu*) or prematurely terminating (gene TSS partial) and a transcript initiating at a *Mu* TSS  
235 reading through the end of the gene (*Mu* TSS transcript).

### 236 237 ***Mu* promoter initiation does not strictly depend on a specific *Mu* element or orientation**

238 There are multiple distinct members of the *Mutator* transposon family that could be mobilized,  
239 and insertions of these elements could occur in forward or reverse orientations relative to the  
240 gene sequence. To further understand the impact of specific *Mu* transposons and their  
241 orientation upon the potential of the *Mu* promoter to initiate outward-reading transcripts, we  
242 sought to characterize the identity and orientation of each *Mu* insertion mutant allele. The *Mu*  
243 sequence from each *de novo* assembled transcript, either present at the 3' end of the gene TSS  
244 partial transcripts or at the 5' end of the *Mu* TSS transcripts, was used to perform a BLAST  
245 search against representative examples of *Zea mays* *Mu* elements. *Mu* element identity was  
246 predicted based on the *Mu* element with the greatest similarity to *Mu* sequence from each  
247 transcript (Figure 4). Most (75%) of the assembled transcripts contain *Mu* sequences that align  
248 to the *Mu* terminal inverted repeats (TIRs) alone with only a subset that include internal *Mu*  
249 sequences (Figure 4). The transcript assembly *Mu* sequence alignments suggest that there are

250 eight *Mu1* or *Mu1.7* elements (these cannot be separated based on the TIR regions alone), two  
251 *Mu3*, five *rcy:Mu7*, five *Mu8* and one *Mu13* element in our set of alleles. The 5' and 3' TIRs of  
252 *Mu* elements often have polymorphisms between the two TIRs and these were used to predict  
253 the orientation of the *Mu* insertion for 15 of the 21 alleles with the presence of *Mu* sequence in  
254 their transcript assembly. One mutant allele with *Mu* inserted into an intron, *bzip76-m2*, had  
255 evidence for only internal *Mu* sequences, potentially suggesting that this allele may produce a  
256 *Mu* spliced transcript instead of a *Mu* TSS transcript. The predictions for *Mu* element identity  
257 and insertion orientation based on sequence alignments were tested using outward-reading  
258 PCR primers with specificity to either the 5' or 3' internal *Mu* sequence (Figure S2). We were  
259 able to confirm the identity for 14 of the 15 *Mu* insertions that had alignment-based predictions  
260 and for 12/14 of these the predicted orientation was supported by PCR-based testing (Figure  
261 S2, Table S3). The *Mu* element identity and orientation for the remaining alleles without  
262 discernible predictions for *Mu* orientation based on transcript alignments was determined using  
263 *Mu* element specific primers (Figure S2).

264

265 The observation that *Mu* elements in both forward and reverse orientations relative to the gene  
266 sequence appear to provide an outward-reading promoter suggested the potential for both bi-  
267 directional transcripts originating from the *Mu* element. The RNA-seq data was generated using  
268 strand-specific protocols. The analysis of read orientation between the control and mutant  
269 samples did not reveal excess antisense RNA-seq reads in the region 5' of the *Mu* insertion  
270 (Figure S3). This suggests orientation-specific transcript initiation, potentially due to directional  
271 interactions with the endogenous promoter. Alternatively, it is possible that antisense transcripts  
272 are highly unstable and rapidly degraded and therefore not observed.

273

#### 274 **Evidence for transcript termination and initiation within *Mu***

275 The observation that the majority of *Mu* insertion alleles within genes generate two separate  
276 transcripts could reflect the failure to assemble *de novo* transcripts through the *Mu* element or  
277 the presence of two independent transcripts, one initiating at the gene TSS and the other  
278 initiating at an outward-reading promoter within *Mu*. Our previous RT-PCR results (Figure 2C)  
279 suggest that at least a portion of *Mu* is not retained in a full-length transcript; however, these  
280 results could also reflect difficulty in successfully amplifying through the full *Mu* element  
281 (amplification of terminal inverted repeat sequences can be challenging). To rule out the  
282 potential of *Mu* insertion alleles producing transcripts that read through the *Mu* element, we  
283 performed RT-PCR using gene-specific primers and *Mu*-specific primers within and beyond the  
284 sequence that is observed in the *de novo* assembled transcripts (Figure 5A, Table S4). To  
285 ensure our RT-PCR *Mu* sequence amplification approach is comparable to the transcriptome  
286 assembly results, mutant and wild-type allele cDNAs were generated from the same tissue type  
287 sampled for RNA-seq. This approach allowed us to determine how much of the *Mu* element was  
288 retained in each mutant allele transcript tested.

289

290 Transcript assemblies using RNA-seq data often fail to capture the full 5' and 3' ends of mRNA  
291 sequences. We noted that a number of the control assemblies lacked the full UTR sequence. In  
292 order to better assess the 3' end of the gene TSS-*Mu* transcript and the 5' end of the *Mu* TSS  
293 transcript, we assessed the presence of RT-PCR amplification products from a gene-specific

294 primer and a primer with specificity to *Mu* sequence. The primers within *Mu* sequences included  
295 primers within the assembled sequences as well as several primers that were further into the  
296 *Mu* sequence. In all cases, we successfully amplified regions that were within the assembled  
297 transcripts (Figure 5B). The transcript boundaries were determined for 4/6 *Mu* TSS transcripts  
298 and all six of the gene TSS-*Mu* transcripts. For the two genes in which the *Mu* TSS initiated  
299 transcript boundary was not determined, there were issues in designing primers that amplified  
300 *Mu* internal sequence (*sbp20-m3*) or there was amplification of *Mu* sequence that was > 600 bp  
301 more internal than the assembly predicted (*wrky87-m2*). The majority of transcripts that were  
302 tested (11/12 for 6 alleles) resulted in successful amplification using primers that were slightly  
303 outside the assembled *Mu* sequence indicating that the assemblies are likely partially truncated.  
304 In most cases in which the transcript has identifiable boundaries (8/10), there were less than  
305 300 bp of additional *Mu* sequence amplified. The other two transcripts reveal evidence for > 300  
306 bp of additional *Mu* sequence beyond the transcript assembly. Together, these results confirm  
307 the lack of read-through transcripts but do suggest that the transcripts may read further into *Mu*  
308 or initiate further within *Mu* than revealed by the transcript assemblies (Figure 5B, Table S4).

309

### 310 **Transcripts from the mutant allele often have similar abundance to the wild-type allele**

311 We were interested in comparing the expression level of each mutant transcript with the wild-  
312 type allele to document potential variability in transcript abundance. To compare expression  
313 levels between the mutant and wild-type alleles, we focused on RNA-seq reads that mapped to  
314 exon regions with shared sequence between the wild-type transcript and either the mutant gene  
315 TSS partial (terminated within *Mu* or prematurely terminated) or *Mu* TSS transcript (Figure 6A,  
316 Table S5). The expression level of shared exon regions (referred to as CPM per fragment)  
317 between the mutant gene TSS partial and wild-type transcripts reveal highly similar transcript  
318 abundances,  $R^2 = 0.97$  for 18 transcripts (Figure 6B, Figure S4). The *Mu* TSS transcript  
319 abundance was generally quite similar to the levels of the wild-type transcript, but *Mu* TSS  
320 transcripts exhibit more variation with an  $R^2 = 0.43$  for 19 transcripts (Figure 6C, Figure S4).  
321 There were several examples of lower expression levels for the *Mu* TSS transcript relative to the  
322 wild-type transcript (Figure 6C). The analysis of the distance of the *Mu* insertion site from the  
323 TSS did not suggest that the variation in expression levels for some *Mu* TSS transcripts was  
324 due to examples with more distant insertion sites. The observation that the *Mu* TSS transcript  
325 abundance is often similar to the wild-type in a single tissue suggests that this *Mu* outward-  
326 reading promoter may provide expression levels comparable to the wild-type gene promoter.

327

### 328 ***Mu*-derived transcripts can maintain similar tissue-specific patterns**

329 We proceeded to assess whether mutant transcripts derived from the gene or *Mu* promoter  
330 would exhibit similar patterns of expression across multiple tissues. To evaluate tissue-specific  
331 expression, we performed RT-qPCR by amplifying transcript regions that are shared between  
332 the wild-type and mutant gene TSS-*Mu* or *Mu* TSS transcripts (Figure 7A, Table S6). To ensure  
333 we could test tissue-specific expression patterns, we selected genes with variable levels of wild-  
334 type gene expression across multiple tissues. Mutant gene TSS-*Mu* transcripts maintain relative  
335 expression levels that are very similar to wild-type transcripts across all tissues tested (Figure  
336 7B) suggesting similar expression patterns for this mutant transcript and the wild-type transcript.  
337 The mutant *Mu* TSS transcripts often maintain wild-type tissue-specificity but frequently have



338 lower relative transcript abundance—higher Delta Ct (Figure 7B). The *Mu* element identity  
339 (*Mu1.7*, *Mu3*, *rcy:Mu7* or *Mu8*) and *Mu* insertion position (5' UTR or CDS) vary among the ten  
340 mutant alleles tested by RT-qPCR. The finding that all 10 mutant allele *Mu* TSS transcripts have  
341 patterns of expression similar to wild-type tissue-specificity suggests the ability of the *Mu*  
342 outward-reading promoter to mimic wild-type gene expression patterns is not entirely dependent  
343 on the specific *Mu* element or where *Mu* inserts within a gene.

344

345

## 346 Discussion

347

348 Previous work characterizing mutant alleles from insertions of *Mutator* transposons in maize  
349 genes identified the presence of an outward-reading promoter in *Mu* (Barkan and Martienssen  
350 1991; Chatterjee and Martin 1997). The ability of this *Mu* outward-reading promoter to initiate  
351 transcription is conditional upon the epigenetic state of *Mu* (Barkan and Martienssen 1991).  
352 *Mutator* elements can be in either one of two states: an active state (*Mu*-active) where there is a  
353 high forward mutation rate from the presence of active *MuDR* transposons or an inactive state  
354 (*Mu*-inactive) without *MuDR* activity (Chomet *et al.* 1991b). The state of *Mu* activity can be  
355 monitored by the extent of DNA methylation in sequences of *Mu* terminal inverted repeats  
356 (TIRs); plants with *Mu*-active state elements are marked by hypomethylation and plants with  
357 *Mu*-inactive exhibit hypermethylation (Bennetzen 1984; Chandler and Walbot 1986; Barkan and  
358 Martienssen 1991; Chandler and Hardeman 1992; Raizada and Walbot 2000). There are  
359 several reports demonstrating that insertions of *Mu* transposons into maize genes can lead to  
360 mutations whose phenotypes are suppressed only in the absence of *Mu* activity (*Mu*-inactive)  
361 (Martienssen *et al.* 1990; Chomet *et al.* 1991b; Lowe *et al.* 1992; Greene *et al.* 1994; Das and  
362 Martienssen 1995; Hu *et al.* 1998; Girard and Freeling 2000; Settles *et al.* 2001; Cui *et al.*  
363 2003). In the *Mu*-inactive state, the *Mu* promoter becomes active and initiates transcription  
364 directed outward into the adjacent gene to restore the phenotype of the *Mu*-induced allele to  
365 that of its progenitor (Barkan and Martienssen 1991). Mutant alleles with phenotypes that  
366 depend on the activity of *Mu* for expression are known as *Mu*-suppressible alleles (Martienssen  
367 *et al.* 1989).

368

369 In our study, we provide evidence that transcript initiation in *Mu* and potential activity of a *Mu*  
370 outward-reading promoter is a common phenomenon for mutant alleles isolated from the  
371 UniformMu mutant population in maize. Most mutant alleles (20/33) isolated in our study have  
372 transcript assembly evidence of transcript initiation in *Mu* sequence. Although we did not directly  
373 examine *Mu* activity in these stocks, we can infer that these mutant alleles are likely in a *Mu*-  
374 inactive state as one step in the creation of the UniformMu population includes selection for  
375 kernels that lack evidence of *Mu* activity prior to identification of insertion alleles (McCarty *et al.*  
376 2005). Previously reported *Mu*-suppressible alleles in maize with evidence of an active promoter  
377 in *Mu* were generated from a *Mu* insertion in the promoter or 5' UTR of a gene (Barkan and  
378 Martienssen 1991; Chatterjee and Martin 1997; Girard and Freeling 2000; Settles *et al.* 2001;  
379 Pooma *et al.* 2002; Cui *et al.* 2003). However, the previously characterized *Mu*-suppressible  
380 alleles were all detected based on phenotypic effects and likely required production of  
381 transcripts from the *Mu* promoter that could produce a functional protein. *Mu* elements inserted

382 near the wild-type TSS provide the potential for production of a transcript that can encode the  
383 full ORF of the gene. However, these insertions near the 5' end of the gene may also allow for  
384 activity of the outward-reading promoter within *Mu* based upon position of this *Mu* promoter very  
385 near the site of the gene promoter which may allow for the *cis*-regulatory elements of the gene  
386 to influence this *Mu* promoter.

387  
388 Our results show that the activity of the outward-reading promoter in *Mu* is not dependent on the  
389 *Mu* insertion site being in the gene promoter or 5' UTR. For the 20 alleles with evidence of a *Mu*  
390 promoter initiated transcript, 13 were isolated in coding sequences from various positions  
391 spanning the gene length, five were within the 5' UTR, and two were within introns. These  
392 results suggest that the distance of the *Mu* promoter from the wild-type gene promoter does not  
393 necessarily determine activity of the *Mu* promoter. Previous reports indicate the *Mu* outward-  
394 reading promoter is located near the edge of the *Mu* element—potentially initiating transcripts  
395 from within the *Mu* TIR sequence (Barkan and Martienssen 1991; Chatterjee and Martin 1997).  
396 When we aligned sequences from *Mu* TSS transcripts of 20 alleles to predicted *Mu* element  
397 sequences, the *Mu* transcribed sequence from 15/20 transcripts mapped entirely to the TIR  
398 sequence. Although the exact location of the promoter within *Mu* was not precisely defined, the  
399 *Mu* outward-reading promoter is likely located near the termini of *Mu*. We find examples of  
400 multiple *Mu* elements (*Mu1.7*, *Mu3*, *rcy:Mu7* and *Mu8*) and *Mu* insertions in either the forward or  
401 reverse orientation relative to the gene TSS can provide an outward-reading promoter. Several  
402 prior studies also suggested that *Mu*-suppressible alleles could include different types of *Mu*  
403 elements and orientations (Greene *et al.* 1994; Girard and Freeling 2000)

404  
405 The UniformMu induced mutations are a widely used tool for functional genomics in maize  
406 (McCarty *et al.* 2005, 2013, 2018; Settles *et al.* 2007; Liu *et al.* 2016). While the silencing of *Mu*  
407 transposition is quite useful for ensuring that the detected *Mu* insertions represent germinal  
408 rather than somatic insertion events, it also has the potential to create *Mu*-suppressible alleles  
409 through potential activation of *Mu* outward-reading promoters. Our study provides evidence that  
410 for many UniformMu mutant alleles the *Mu* element provides an outward-reading promoter that  
411 can direct transcription into adjacent gene sequences. *Mu* promoter activity seems to be similar  
412 to *Mu* suppression in terms of frequency, as it has been reported that in the absence of *Mu*  
413 activity over half of the *Mu*-induced mutations are suppressed (May *et al.* 2003). Although we  
414 found that *Mu* promoter activity does not depend on insertion site, it is known that *Mu*  
415 preferentially inserts into promoter and 5' UTR regions (Dietrich *et al.* 2002; Vollbrecht *et al.*  
416 2010; Springer *et al.* 2018). This means that many *Mu* insertion alleles within the UniformMu  
417 population represent 5' UTR insertion events. Researchers should use caution when  
418 interpreting the phenotypic results of these insertion events as it is possible that *Mu* promoter  
419 initiated transcripts could complement the insertion. Failure to obtain RT-PCR products when  
420 using primers that flank the *Mu* insertion site does not necessarily indicate a true loss-of-  
421 function allele as a *Mu* initiated transcript could still be produced. *Mu* insertions into regions  
422 upstream of the gene coding sequence are not only the most abundant (42%) in the UniformMu  
423 population (McCarty *et al.* 2013; Andorf *et al.* 2016), but also allow the potential for the promoter  
424 in *Mu* to drive a transcript that includes the entire original ORF and complement the mutant  
425 phenotype.

426

427 The tissue-specificity of the *Mu* outward-reading promoter has not been well characterized. The  
428 ability of the *Mu* outward-reading promoter to suppress phenotypes of *Mu* insertion alleles  
429 suggests the ability to drive expression in tissues in which the gene product is needed to  
430 normally function. Prior work on *hcf106-mum1* suppressible alleles revealed that both the wild-  
431 type *Hcf106* and *hcf106:Mu* exhibit similar patterns of expression response to light (Barkan and  
432 Martienssen 1991), albeit with higher levels of expression for the wild-type gene compared to  
433 *hcf106:Mu*. Our collection of transcripts initiated within *Mu* provided an opportunity for a broader  
434 characterization of the activity of the *Mu* outward-reading promoter. Our findings suggest that  
435 the outward-reading promoter seems to be able to mimic the gene promoter in terms of  
436 expression level and tissue-specificity and has limited inherent patterns of expression. The  
437 RNA-seq data was generated from multiple tissues depending on which tissues exhibit high  
438 levels of expression for the wild-type gene. We found that the transcript abundance (CPM per  
439 fragment) of the mutant *Mu* TSS transcripts tend to be similar to wild-type for most alleles and  
440 that there were not consistent differences in the expression of the *Mu* TSS transcripts among  
441 the tissues. Several genes that were selected for characterization of expression patterns by RT-  
442 qPCR normally exhibit variation in expression among the profiled tissues. We found that the *Mu*  
443 TSS transcripts tended to mimic these tissue-specific patterns. Although *Mu* TSS transcripts  
444 follow wild-type tissue-specific patterns, they often exhibit expression levels that are slightly  
445 lower than that of gene TSS partial transcripts relative to wild-type. Our results, along with  
446 previous reports (Chomet *et al.* 1991a; Barkan and Martienssen 1991; Lowe *et al.* 1992; Settles  
447 *et al.* 2001; Cui *et al.* 2003), imply that *Mu* might provide a minimal outward-reading promoter  
448 that can interact with genic *cis*-regulatory elements to condition expression patterns and levels  
449 that are similar to the wild-type gene.

450

451 There are several mechanisms by which maize transposons can minimize the functional impact  
452 of insertions into genic regions. The *Mu* family of transposons seems to have adopted a  
453 mechanism of providing an outward-reading promoter that is active when the *Mu* is silenced.  
454 The coupling of this mechanism with the preferential insertion within promoters and 5' UTRs  
455 provides the opportunity for *Mu* elements to insert within open chromatin regions while limiting  
456 potential deleterious consequences. Our findings and previous studies (Barkan and Martienssen  
457 1991) suggest that the *Mu* promoter relies on interactions with genic *cis*-regulatory elements to  
458 mimic wild-type gene expression patterns. By providing a minimal promoter that can mimic gene  
459 expression patterns *Mu* elements have the ability to insert and increase in copy number with  
460 limited effects on the long-term survival in the host. This provides an elegant solution for a  
461 transposon to potentially limit the consequences of its proliferation.

462

463 This study provides evidence that *Mu* transposon insertions often result in complex transcripts  
464 for the gene rather than clear loss-of-function alleles. Our mutant allele transcript assemblies  
465 frequently include examples of termination and initiation in *Mu* sequence. Transcripts initiating  
466 from *Mu* are likely derived from a *Mu* outward-reading promoter that may produce functional  
467 transcripts if these include the full ORF of the gene. These results have implications for the  
468 many researchers that utilize UniformMu for reverse genetics. Further studies are necessary to  
469 document whether the *Mu* outward-reading promoter requires a *Mu*-inactive state and to

470 uncover the mechanisms that allow the *Mu* promoter to interact with genic *cis*-regulatory  
471 elements. The ability of *Mu* to provide an outward-reading promoter also has implications for  
472 future transposon biology. The system by which conditional activity of a *Mu* promoter  
473 determines whether *Mu* can suppress a mutant allele should be utilized to understand the  
474 relationship between transposons and host genomes.

475

## 476 **Methods**

477

### 478 **Isolation of homozygous mutant alleles from the UniformMu population in maize**

479 Transposon-indexed seed stocks were ordered from MaizeGDB Stock Center (Lawrence *et al.*  
480 2004; McCarty *et al.* 2005). Most alleles were selected based on insertions into the coding  
481 sequence or 5' UTR. Seeds were planted in the field to maintain seed stocks. At the Vegetative  
482 3 (V3) developmental stage leaf tissue was collected for DNA isolation. Mutant alleles were  
483 genotyped to identify the presence and zygosity of *Mu* with gene-specific primers flanking the  
484 *Mu* insertion and a primer with specificity to the *Mu* TIR regions: 9242, as described in (McCarty  
485 *et al.* 2013). Homozygous transmissible alleles were then isolated after backcrossing twice to  
486 the W22 r-g inbred if possible, to reduce the original mutation load from the transposon-indexed  
487 stock (Table S1).

488

### 489 **Plant material for RNA-seq samples**

490 Wild type tissue-specific expression data from B73v4 (Zhou *et al.* 2019) and W22 (Monnahan *et al.*  
491 2020) were used to identify tissues where each of the 24 maize genes with a *Mu*-insertion  
492 mutant allele had moderate to high expression. To capture expression of each of the 24 genes  
493 in both mutant and control conditions, 5 different tissues were selected to sample: coleoptile tip,  
494 seedling leaf, imbibed embryo, tassel, and tassel stem (Table S2). Three biological replicates of  
495 the mutant allele and at least three biological replicates of control W22 r-g were sampled for  
496 RNA-seq from the respective tissue selected for each gene (Table S1). Samples for each tissue  
497 were collected on the same day at the same time with the 24 h time sampled listed in  
498 parentheses. At anthesis, tassel stems (~3 cm, anthers extruded, 9:00) and whole tassels  
499 (anthers unextruded, 12:00) were sampled from three plants in the field each and pooled for one  
500 biological replicate. Embryos were dissected (from 8:00-11:00) after imbibing seeds in distilled  
501 water for 48 h at 31°C and 5 embryos were pooled for one biological replicate. For seedling leaf  
502 tissue, the V3 collared leaf was sampled (9:00) from each seedling 10 days after sowing (DAS)  
503 in 16 h light 28°C, 8 h dark 24°C growth chamber conditions and 3 leaves were pooled for each  
504 biological replicate. Coleoptile tips were sampled (9:00) from seeds 6 DAS in 30°C dark  
505 conditions using a paper towel cigar roll method for germination (Zhu *et al.* 2005) and 3 tips  
506 (~2.5 cm) were pooled for each biological replicate.

507

### 508 **RNA-seq data processing**

509 Total RNA was extracted using the RNeasy Plant Mini Kit (QIAGEN, Cat # 74904), quantified  
510 internally and externally by University of Minnesota Genomics Center (UMGC) with the Quant-iT  
511 RiboGreen RNA Assay Kit (Thermo Fisher, Cat # R11490), and quality checked with the Agilent  
512 2100 Bioanalyzer. One biological replicate of the mutant allele, *gras52-m1*, had low RNA quality  
513 and was discarded prior to sequencing. Sequence libraries were prepared from a minimum of

514 500 ng of total RNA using the standard TruSeq Stranded mRNA library protocol (Illumina, Cat #  
515 20020595) and sequenced on the NovaSeq 6000 S4 flow cell to produce at least 20 million 150  
516 bp paired-end reads for each sample. For all samples with paired-end sequencing, both library  
517 construction and sequencing were done at UMGC. Library construction and sequencing for two  
518 mutant alleles, *hsf24-m3* and *hsf24-m4*, and W22 control sampled from tassel tissue was done  
519 externally at the Genomic Core at Michigan State University. For these samples, libraries were  
520 prepared from 2 µg of total RNA using the TruSeq RNA Sample Prep Kit (Illumina, Cat # FC-  
521 122-1001) and sequenced on the HiSeq 4000 to produce at least 18 million 50 bp single-end  
522 reads.

523

524 For all samples, sequencing reads were then processed through the nf-core RNA-Seq pipeline  
525 (Di Tommaso *et al.* 2017; Ewels *et al.* 2020) built with Nextflow v20.10.0 (Di Tommaso *et al.*  
526 2017) for initial QC and raw read counting. Reads were trimmed using Trim Galore! v0.6.5  
527 (Krueger) and aligned to the W22 reference genome (Springer *et al.* 2018) using Hisat2 v2.1.0  
528 (Kim *et al.* 2015) with default parameters (“hisat2 -x \$db \$input -p 12 --met-stderr --new-  
529 summary”). Uniquely aligned reads were counted per feature by featureCounts v2.0.1 (Liao *et*  
530 *al.* 2014). Raw read counts were normalized by library size and corrected for library composition  
531 bias using the TMM normalization approach in edgeR v3.28.0 (Oshlack *et al.* 2010), to give  
532 CPMs (Counts Per Million reads) for each gene in each sample allowing direct comparison  
533 between mutant and control samples (Table S1). CPM values were normalized by gene CDS  
534 lengths to give FPKM (Fragments Per Kilobase of exon per Million reads) values (Table S1).

535 Genes were considered expressed if their CPM was  $\geq 1$  in at least one sample per tissue.

536

### 537 **Identification of differentially expressed genes**

538 Raw read counts of expressed genes (CPM  $\geq 1$  in at least 1 sample per tissue) from all  
539 replicates of each mutant allele and W22 control from the same tissue were used to call  
540 differentially expressed (DE) genes, false discovery rate [FDR] adjusted p-value  $< 0.05$  and a  
541 minimum fold change of 2 (DESeq2 v1.30.1 (Love *et al.* 2014)) (Table S1).

542

### 543 **Transcriptome profiling**

544 Reads from RNA-seq data of combined biological replicates for each allele, mutant or control,  
545 were trimmed with Trimmomatic v0.33 (Bolger *et al.* 2014) and *de novo* assembled into  
546 transcripts with TRINITY v2.5.1 (Grabherr *et al.* 2011) using default parameters. A local blast  
547 database (SequenceServer (Priyam *et al.* 2019)) was created for each *de novo* transcriptome  
548 assembly to identify transcripts aligning to the W22 gene cDNA in both the mutant and control.  
549 W22 control transcript assemblies for each gene were analyzed first by both BLASTn (Altschul  
550 *et al.* 1990) and the ExpASy translate tool (Duvaud *et al.* 2021) to confirm TRINITY could  
551 assemble the full-length gene cDNA from the RNA-seq short-read data. The canonical ORF of  
552 each gene was identified by comparing the annotated W22 gene cDNA sequence to sequences  
553 of orthologous genes in other grass species (i.e., *Sorghum Bicolor*, *Setaria Italica*, *Oryza sativa*)  
554 via BLASTx. To determine if Mu sequence was transcribed, the transcript assembly sequence

555 of each mutant allele was searched against all standard nucleotide databases by BLASTn  
556 without specifying an organism (Altschul *et al.* 1990). The effect of the transposon insertion for  
557 each mutant allele was predicted by examining the putative ORF. A six-frame translation was  
558 completed for each mutant and wild-type transcript with the Expsy translate tool (Duvaud *et al.*  
559 2021) to identify the mutant ORF with shared sequence to the corresponding wild-type transcript  
560 and detect upstream ORFs within *Mu* sequence (Table S1, Data File S1).

561

### 562 **Predictions of *Mu* element identity and orientation**

563 Sequence from each mutant assembled transcript was used as a query against all public  
564 sequencing databases—NCBI to identify if there were any hits to *Mu* elements (Data File S1).  
565 Complete sequences of representative *Zea mays* *Mu* elements with transcript assembly hits:  
566 *Mu1* (X00913.1), *Mu1.7* (Y00603.1), *Mu3* (JX843286.1:132-1963), *Mu4* (X14224.1), *Mu5*  
567 (X14225.1), *rcy:Mu7* (X15872.1), *Mu8* (X53604.1), *Mu13* (HQ698272.1), *Mu17* (HQ698276.1),  
568 and *MuDR-MudrA* and *MudrB* (M76978.1), were used to create a local *Mu* element BLAST  
569 database (SequenceServer (Priyam *et al.* 2019)) (GenBank Nucleotide Accessions from NCBI).  
570 *Mu* sequence from each assembled transcript was then BLAST against only *Mu* element  
571 sequence and top hits were used to predict the *Mu* element for each allele (Data File S1). The  
572 *Mu* sequence from assembled transcripts of each mutant allele was then aligned to the  
573 complete sequence of the predicted *Mu* element. *Mu* element insertion orientation could be  
574 predicted when transcribed *Mu* sequence either only aligned to or aligned with greater similarity  
575 to 5' or 3' regions of *Mu*.

576

### 577 **PCR confirmation of *Mu* element identity and orientation**

578 For each predicted *Mu* element, outward-reading primers with specificity to either the 5' or 3'  
579 sequence of *Mu* were designed (Table S3). We refer to a forward orientation of *Mu* when *Mu* 5'  
580 TIR sequence relative to 3' TIR sequence is closest to the gene TSS and reverse orientation  
581 when *Mu* 3' TIR sequence is closest to the gene TSS. PCR was performed on mutant allele  
582 gDNA with specific combinations of gene-specific (referred to as F and R) and *Mu*-specific  
583 primers (referred to as 5 and 3) to confirm the identity and orientation of *Mu* (Table S3). The  
584 presence of amplicons from F:5 and/or R:3 indicates a *Mu* element with forward orientation  
585 while amplification from F:3 and/or R:5 indicates reverse orientation. The *Mu* primers designed  
586 had specificity to 5' or 3' sequences of a specific *Mu* element. Amplification of gDNA using these  
587 *Mu* element-specific primers was considered *Mu* element identity confirmation.

588

### 589 **Mutant assembled transcript structure assessed by RT-PCR**

590 *Mu* sequences from transcript assemblies of all mutant alleles with a shared *Mu* element identity  
591 were aligned to the complete sequence of that *Mu* element. Outward-reading PCR primers were  
592 designed with specificity to regions of the *Mu* sequence included in the transcript assembly and  
593 regions outside of the assembly for each mutant allele (Table S4). Gene-specific primers  
594 flanking the *Mu* insertion were designed with specificity to both mutant allele gDNA and cDNA  
595 sequence (Table S4). For each mutant allele, PCR was performed on both gDNA and cDNA to  
596 determine if mutant transcripts terminated and initiated in *Mu* at the predicted transcript  
597 assembly sites. As a control, PCR was first performed on mutant allele gDNA to detect  
598 presence of amplification from each primer-set designed with specificity to gene and *Mu*

599 sequence included in and outside of the transcript assembly. Combinations of gene-specific and  
600 *Mu*-specific primers that amplified mutant gDNA were then used to test for presence of  
601 amplification from mutant cDNA (Table S4). To test the predicted transcript structures for six  
602 mutant alleles by RT-PCR, total RNA was extracted from the same tissue type sampled for  
603 RNA-seq. Extracting RNA from the same tissue type RNA-seq was performed on allows for  
604 direct comparison between our RT-PCR results and the assembly results without bias of  
605 amplification from tissue-specific isoforms. Tissue was sampled for at least three biological  
606 replicates of each mutant allele and W22 control using tissue sampling methods listed above in  
607 the Plant Material section. Total RNA was extracted from ~100 mg of tissue/sample using  
608 TRIzol™ Reagent (Thermo Fisher, Cat # 15596026), DNase treated (TURBO DNA-free™ Kit,  
609 Thermo Fisher, Cat # AM1907), and quantified with Quant-iT RiboGreen RNA Assay Kit  
610 (Thermo Fisher, Cat # R11490). RT-PCR reactions for each primer set were performed on RNA  
611 (50-75 ng/ul) from at least two biological replicates of the mutant allele and control (QIAGEN  
612 OneStep RT-PCR Kit, QIAGEN Inc., Cat # 210212). The bounds of where transcriptional  
613 termination and initiation occurs within *Mu* for each mutant allele was determined by presence  
614 of amplification from gDNA and absence of amplification from cDNA. If there was amplification  
615 of mutant cDNA from primers designed to amplify regions outside of the transcript assembly,  
616 then more *Mu* sequence was transcribed than the assembly predicted.

617

#### 618 **Transcript abundance (CPM per fragment) calculations**

619 Mutant assembled transcripts were aligned to wild-type assembled transcripts via MAFFT v7  
620 (Kato and Standley 2013) in Benchling and regions of shared sequence were identified.  
621 Genomic coordinates of these shared exon regions were used to create an annotation file (BED  
622 format) for each gene. BAM files (from uniquely aligned RNA-seq reads previously mapped to  
623 the W22 genome) for each of the three biological replicates of mutant and W22 control were  
624 converted to BED format (BEDTools bamtobed (Quinlan and Hall 2010)). The RNA-seq mapped  
625 read BED file of each mutant or control biological replicate was intersected with the shared exon  
626 read annotation file to obtain new read counts (BEDTools intersect-force strandedness (Quinlan  
627 and Hall 2010)). Read counts were then normalized by the effective library size with edgeR  
628 v3.28.0 (Oshlack *et al.* 2010) to give CPMs (Counts Per Million reads) for each gene in each  
629 sample. Transcript abundance was calculated by averaging the CPMs from all three biological  
630 replicates of each mutant allele or W22 control (Table S5). The coordinates of shared sequence  
631 regions between mutant and wild-type transcripts usually span multiple exons; therefore, we  
632 refer to this transcript abundance calculation as CPM per fragment. Linear regression was used  
633 to calculate  $R^2$  correlation values between mutant and wild-type transcript abundance (lm  
634 function in R (R Core Team 2020)).

635

#### 636 **Tissue-specific expression patterns of mutant transcripts**

637 Five genes (two independent mutant alleles each) with variable levels of wild-type gene  
638 expression across multiple tissues were selected to analyze by RT-qPCR. To examine tissue-  
639 specific patterns of expression for each of the 10 mutant alleles relative to wild-type, 7 different  
640 tissues at various stages of maize development (immature to mature) were selected to sample:  
641 imbibed embryo, coleoptile tip, seedling shoot, seedling radical root, flag leaf, tassel stem, and  
642 immature ear spikelet. Three biological replicates of each mutant allele and W22 control were

643 sampled for RNA from each of the seven tissues. The same sampling methods listed above in  
644 the Plant Material section were used to sample imbibed embryo, coleoptile tip, and tassel stem  
645 tissues. Coleoptile tips and radical roots were sampled (9:00) from the same plants, from seeds  
646 6 DAS in 30C dark conditions, and 6 tips and roots were pooled for each biological replicate.  
647 Whole shoots from three seedlings 10 DAS in 16 h light 28°C, 8 h dark 24°C growth chamber  
648 conditions were sampled (9:00) and pooled for one biological replicate. Along with tassel stems  
649 (11:30), unfertilized ear spikelets and flag leaves were sampled (10:30) at anthesis and tissue  
650 from three plants was pooled for one biological replicate. Unfertilized ear spikelets were  
651 sampled by trimming the terminal 4 cm of the ear and collecting the next 2 cm. For flag leaves,  
652 the terminal 15 cm of the flag leaf blade was collected.

653  
654 Total RNA was extracted from ~100 mg of tissue per sample using TRIzol™ Reagent (Thermo  
655 Fisher, Cat # 15596026), DNase treated (TURBO DNA-free™ Kit, Thermo Fisher, Cat #  
656 AM1907), and quantified with Quant-iT RiboGreen RNA Assay Kit (Thermo Fisher, Cat #  
657 R11490). RNA from other tissues was diluted to 75 ng/ul prior to RT-qPCR. Primers for RT-  
658 qPCR were designed with specificity to amplify shared gene sequence (~300 bp) between  
659 mutant and wild-type transcript assemblies: regions 5' of *Mu* sequence in mutant gene TSS-*Mu*  
660 transcripts and regions 3' of *Mu* sequence in mutant *Mu* TSS transcripts (Table S6). The Luna®  
661 Universal One-Step RT-qPCR Kit (New England Biolabs, Cat # E3005X) and reaction protocol  
662 (cycle variations: initial denaturation for 2 min., 39 cycles of denaturation/extension, and melt  
663 curve 65C-95C at 0.5C increments) was used to run all RT-qPCR reactions. For each primer-  
664 set and tissue, RT-qPCR was performed on three technical replicates of each biological  
665 replicate for three biological replicates of the mutant allele and control. Technical replicate Ct  
666 values were averaged for each biological replicate. Delta Ct (dCt) values were calculated by the  
667 difference between the gene Ct value and the Ct value of the selected maize housekeeping  
668 gene, *Ubiquitin Carrier Protein (Zm00004b005988)* (Manoli *et al.* 2012) for each biological  
669 replicate. Then, dCt values for all three biological replicates were averaged to give a final dCt  
670 value for each transcript (Table S6).

671

#### 672 **Data and code availability**

673 All datasets and scripts necessary for data analysis are available in the GitHub repository at  
674 [https://github.com/erikamag/Mu-Pro\\_manuscript](https://github.com/erikamag/Mu-Pro_manuscript). The RNA-seq data generated for this study is  
675 available and NCBI SRA PRJNA936808.

676

677

#### 678 **Acknowledgements:**

679 We thank the Minnesota Supercomputing Institute at the University of Minnesota  
680 (<http://www.msi.umn.edu>) for providing resources that contributed to the research results  
681 reported within this article. We thank Chase Dickson, Hayden Hamsher and Noelle Lynch for  
682 helping with data generation.

683

#### 684 **Funding:**

685 This study was funded by the National Science Foundation (grants IOS-1733633 and IOS-  
686 1934384).



687  
688  
689  
690

**References:**

- 691 Alleman M., and M. Freeling, 1986 The Mu transposable elements of maize: evidence for  
692 transposition and copy number regulation during development. *Genetics* 112: 107–119.
- 693 Altschul S. F., W. Gish, W. Miller, E. W. Myers, and D. J. Lipman, 1990 Basic local alignment  
694 search tool. *J. Mol. Biol.* 215: 403–410.
- 695 Andorf C. M., E. K. Cannon, J. L. Portwood 2nd, J. M. Gardiner, L. C. Harper, *et al.*, 2016  
696 MaizeGDB update: new tools, data and interface for the maize model organism database.  
697 *Nucleic Acids Res.* 44: D1195–201.
- 698 Barkan A., and R. A. Martienssen, 1991 Inactivation of Maize Transposon Mu Suppresses a  
699 Mutant Phenotype by Activating an Outward-Reading Promoter Near the End of Mu1.  
700 *Proceedings of the National Academy of Sciences* 88: 3502–3506.
- 701 Bennetzen J. L., 1984 Transposable element Mu1 is found in multiple copies only in  
702 Robertson's Mutator maize lines. *J. Mol. Appl. Genet.* 2: 519–524.
- 703 Bennetzen J. L., and P. S. Springer, 1994 The generation of Mutator transposable element  
704 subfamilies in maize. *Theor. Appl. Genet.* 87: 657–667.
- 705 Bennetzen J. L., 1996 The Mutator transposable element system of maize. *Curr. Top. Microbiol.*  
706 *Immunol.* 204: 195–229.
- 707 Bennetzen J. L., 2000 The many hues of plant heterochromatin. *Genome Biol.* 1: REVIEWS107.
- 708 Bensen R. J., G. S. Johal, V. C. Crane, J. T. Tossberg, P. S. Schnable, *et al.*, 1995 Cloning and  
709 characterization of the maize An1 gene. *Plant Cell* 7: 75–84.
- 710 Bessereau J. L., A. Wright, D. C. Williams, K. Schuske, M. W. Davis, *et al.*, 2001 Mobilization of  
711 a *Drosophila* transposon in the *Caenorhabditis elegans* germ line. *Nature* 413: 70–74.
- 712 Bessereau J.-L., 2006 Insertional mutagenesis in *C. elegans* using the *Drosophila* transposon  
713 Mos1: a method for the rapid identification of mutated genes. *Methods Mol. Biol.* 351: 59–  
714 73.
- 715 Bolger A. M., M. Lohse, and B. Usadel, 2014 Trimmomatic: a flexible trimmer for Illumina  
716 sequence data. *Bioinformatics* 30: 2114–2120.
- 717 Bortiri E., G. Chuck, E. Vollbrecht, T. Rocheford, R. Martienssen, *et al.*, 2006 ramosa2 encodes  
718 a LATERAL ORGAN BOUNDARY domain protein that determines the fate of stem cells in  
719 branch meristems of maize. *Plant Cell* 18: 574–585.
- 720 Briggs S., and B. Meeley, 1995 Reverse genetics for maize. *Maize Genetics Cooperation*  
721 *Newsletter* 69: 67–82.
- 722 Brown W. E., D. S. Robertson, and J. L. Bennetzen, 1989 Molecular analysis of multiple

- 723 mutator-derived alleles of the bronze locus of maize. *Genetics* 122: 439–445.
- 724 Brown J., and V. Sundaresan, 1992 Genetic study of the loss and restoration of Mutator  
725 transposon activity in maize: evidence against dominant-negative regulator associated with  
726 loss of activity. *Genetics* 130: 889–898.
- 727 Brutnell T. P., 2002 Transposon tagging in maize. *Funct. Integr. Genomics* 2: 4–12.
- 728 Brutnell T. P., and L. J. Conrad, 2003 Transposon tagging using Activator (Ac) in maize.  
729 *Methods Mol. Biol.* 236: 157–176.
- 730 Cain A. K., L. Barquist, A. L. Goodman, I. T. Paulsen, J. Parkhill, *et al.*, 2020 A decade of  
731 advances in transposon-insertion sequencing. *Nat. Rev. Genet.* 21: 526–540.
- 732 Chandler V. L., and V. Walbot, 1986 DNA modification of a maize transposable element  
733 correlates with loss of activity. *Proc. Natl. Acad. Sci. U. S. A.* 83: 1767–1771.
- 734 Chandler V. L., and K. J. Hardeman, 1992 The Mu elements of *Zea mays*. *Adv. Genet.* 30: 77–  
735 122.
- 736 Chatterjee M., and C. Martin, 1997 Tam3 produces a suppressible allele of the DAG locus of  
737 *Antirrhinum majus* similar to Mu-suppressible alleles of maize. *Plant J.* 11: 759–771.
- 738 Chen C. H., K. K. Oishi, B. Kloeckener-Gruissem, and M. Freeling, 1987 Organ-specific  
739 expression of maize *Adh1* is altered after a Mu transposon insertion. *Genetics* 116: 469–  
740 477.
- 741 Chomet P., D. Lisch, K. J. Hardeman, V. L. Chandler, and M. Freeling, 1991a Identification of a  
742 regulatory transposon that controls the Mutator transposable element system in maize.  
743 *Genetics* 129: 261–270.
- 744 Chomet P., D. Lisch, K. J. Hardeman, V. L. Chandler, and M. Freeling, 1991b Identification of a  
745 regulatory transposon that controls the Mutator transposable element system in maize.  
746 *Genetics* 129: 261–270.
- 747 Cooley L., R. Kelley, and A. Spradling, 1988 Insertional mutagenesis of the *Drosophila* genome  
748 with single P elements. *Science* 239: 1121–1128.
- 749 Cresse A. D., S. H. Hulbert, W. E. Brown, J. R. Lucas, and J. L. Bennetzen, 1995 Mu1-related  
750 transposable elements of maize preferentially insert into low copy number DNA. *Genetics*  
751 140: 315–324.
- 752 Cui X., A. P. Hsia, F. Liu, D. A. Ashlock, R. P. Wise, *et al.*, 2003 Alternative transcription  
753 initiation sites and polyadenylation sites are recruited during Mu suppression at the *rf2a*  
754 locus of maize. *Genetics* 163: 685–698.
- 755 Das L., and R. Martienssen, 1995 Site-selected transposon mutagenesis at the *hcf106* locus in  
756 maize. *Plant Cell* 7: 287–294.
- 757 Dietrich C. R., F. Cui, M. L. Packila, J. Li, D. A. Ashlock, *et al.*, 2002 Maize Mu transposons are  
758 targeted to the 5' untranslated region of the *gl8* gene and sequences flanking Mu target-

- 759 site duplications exhibit nonrandom nucleotide composition throughout the genome.  
760 *Genetics* 160: 697–716.
- 761 Di Tommaso P., M. Chatzou, E. W. Floden, P. P. Barja, E. Palumbo, *et al.*, 2017 Nextflow  
762 enables reproducible computational workflows. *Nat. Biotechnol.* 35: 316–319.
- 763 Duvaud S., C. Gabella, F. Lisacek, H. Stockinger, V. Ioannidis, *et al.*, 2021 Expasy, the Swiss  
764 Bioinformatics Resource Portal, as designed by its users. *Nucleic Acids Res.* 49: W216–  
765 W227.
- 766 Ewels P. A., A. Peltzer, S. Fillinger, H. Patel, J. Alneberg, *et al.*, 2020 The nf-core framework for  
767 community-curated bioinformatics pipelines. *Nat. Biotechnol.* 38: 276–278.
- 768 Fedoroff N. V., and V. Chandler, 1994 Inactivation of Maize Transposable Elements, pp. 349–  
769 385 in *Homologous Recombination and Gene Silencing in Plants*, edited by Paszkowski J.  
770 Springer Netherlands, Dordrecht.
- 771 Fernandes J., Q. Dong, B. Schneider, D. J. Morrow, G.-L. Nan, *et al.*, 2004 Genome-wide  
772 mutagenesis of *Zea mays* L. using RescueMu transposons. *Genome Biol.* 5: R82.
- 773 Girard L., and M. Freeling, 2000 Mutator-suppressible alleles of rough sheath1 and liguleless3  
774 in maize reveal multiple mechanisms for suppression. *Genetics* 154: 437–446.
- 775 Grabherr M. G., B. J. Haas, M. Yassour, J. Z. Levin, D. A. Thompson, *et al.*, 2011 Full-length  
776 transcriptome assembly from RNA-Seq data without a reference genome. *Nat. Biotechnol.*  
777 29: 644–652.
- 778 Greene B., R. Walko, and S. Hake, 1994 Mutator insertions in an intron of the maize knotted1  
779 gene result in dominant suppressible mutations. *Genetics* 138: 1275–1285.
- 780 Guo Y., J. M. Park, B. Cui, E. Humes, S. Gangadharan, *et al.*, 2013 Integration profiling of gene  
781 function with dense maps of transposon integration. *Genetics* 195: 599–609.
- 782 Hanley S., D. Edwards, D. Stevenson, S. Haines, M. Hegarty, *et al.*, 2000 Identification of  
783 transposon-tagged genes by the random sequencing of Mutator-tagged DNA fragments  
784 from *Zea mays*. *Plant J.* 23: 557–566.
- 785 Hershberger R. J., C. A. Warren, and V. Walbot, 1991 Mutator activity in maize correlates with  
786 the presence and expression of the Mu transposable element Mu9. *Proc. Natl. Acad. Sci.*  
787 U. S. A. 88: 10198–10202.
- 788 Hershberger R. J., M. I. Benito, K. J. Hardeman, C. Warren, V. L. Chandler, *et al.*, 1995  
789 Characterization of the major transcripts encoded by the regulatory MuDR transposable  
790 element of maize. *Genetics* 140: 1087–1098.
- 791 Hirsch C. D., N. M. Springer, and C. N. Hirsch, 2015 Genomic limitations to RNA sequencing  
792 expression profiling. *Plant J.* 84: 491–503.
- 793 Hu G., N. Yalpani, S. P. Briggs, and G. S. Johal, 1998 A porphyrin pathway impairment is  
794 responsible for the phenotype of a dominant disease lesion mimic mutant of maize. *Plant*  
795 *Cell* 10: 1095–1105.

- 796 Ivics Z., M. A. Li, L. Mátés, J. D. Boeke, A. Nagy, *et al.*, 2009 Transposon-mediated genome  
797 manipulation in vertebrates. *Nat. Methods* 6: 415–422.
- 798 Katoh K., and D. M. Standley, 2013 MAFFT multiple sequence alignment software version 7:  
799 improvements in performance and usability. *Mol. Biol. Evol.* 30: 772–780.
- 800 Kim D., B. Langmead, and S. L. Salzberg, 2015 HISAT: a fast spliced aligner with low memory  
801 requirements. *Nat. Methods* 12: 357–360.
- 802 Krueger F., *TrimGalore: A wrapper around Cutadapt and FastQC to consistently apply adapter*  
803 *and quality trimming to FastQ files, with extra functionality for RRBS data.* Github.
- 804 Lawrence C. J., Q. Dong, M. L. Polacco, T. E. Seigfried, and V. Brendel, 2004 MaizeGDB, the  
805 community database for maize genetics and genomics. *Nucleic Acids Res.* 32: D393–7.
- 806 Levy A. A., A. B. Britt, K. R. Luehrsen, V. L. Chandler, C. Warren, *et al.*, 1989 Developmental  
807 and genetic aspects of Mutator excision in maize. *Dev. Genet.* 10: 520–531.
- 808 Levy A. A., and V. Walbot, 1991 Molecular analysis of the loss of somatic instability in the  
809 bz2::mu1 allele of maize. *Mol. Gen. Genet.* 229: 147–151.
- 810 Liao Y., G. K. Smyth, and W. Shi, 2014 featureCounts: an efficient general purpose program for  
811 assigning sequence reads to genomic features. *Bioinformatics* 30: 923–930.
- 812 Lisch D., P. Chomet, and M. Freeling, 1995 Genetic characterization of the Mutator system in  
813 maize: behavior and regulation of Mu transposons in a minimal line. *Genetics* 139: 1777–  
814 1796.
- 815 Lisch D., 2002 Mutator transposons. *Trends Plant Sci.* 7: 498–504.
- 816 Lisch D., and N. Jiang, 2015 Mutator and MULE Transposons. *Microbiol Spectr* 3: MDNA3–  
817 0032–2014.
- 818 Liu P., D. R. McCarty, and K. E. Koch, 2016 Transposon Mutagenesis and Analysis of Mutants  
819 in UniformMu Maize (*Zea mays*), in *Current Protocols in Plant Biology*, John Wiley & Sons,  
820 Inc.
- 821 Love M. I., W. Huber, and S. Anders, 2014 Moderated estimation of fold change and dispersion  
822 for RNA-seq data with DESeq2. *Genome Biol.* 15: 550.
- 823 Lowe B., J. Mathern, and S. Hake, 1992 Active Mutator elements suppress the knotted  
824 phenotype and increase recombination at the Kn1-O tandem duplication. *Genetics* 132:  
825 813–822.
- 826 Manoli A., A. Sturaro, S. Trevisan, S. Quaggiotti, and A. Nonis, 2012 Evaluation of candidate  
827 reference genes for qPCR in maize. *J. Plant Physiol.* 169: 807–815.
- 828 Marcon C., L. Altrogge, Y. N. Win, T. Stöcker, J. M. Gardiner, *et al.*, 2020 BonnMu: A  
829 Sequence-Indexed Resource of Transposon-Induced Maize Mutations for Functional  
830 Genomics Studies. *Plant Physiol.* 184: 620–631.
- 831 Martienssen R. A., A. Barkan, M. Freeling, and W. C. Taylor, 1989 Molecular cloning of a maize

- 832 gene involved in photosynthetic membrane organization that is regulated by Robertson's  
833 Mutator. *EMBO J.* 8: 1633–1639.
- 834 Martienssen R., A. Barkan, W. C. Taylor, and M. Freeling, 1990 Somatic heritable switches  
835 in the DNA modification of Mu transposable elements monitored with a suppressible  
836 mutant in maize. *Genes Dev.* 4: 331–343.
- 837 Martienssen R., and A. Baron, 1994 Coordinate suppression of mutations caused by  
838 Robertson's mutator transposons in maize. *Genetics* 136: 1157–1170.
- 839 May B. P., H. Liu, E. Vollbrecht, L. Senior, P. D. Rabinowicz, *et al.*, 2003 Maize-targeted  
840 mutagenesis: A knockout resource for maize. *Proc. Natl. Acad. Sci. U. S. A.* 100: 11541–  
841 11546.
- 842 McCarty D. R., A. Mark Settles, M. Suzuki, B. C. Tan, S. Latshaw, *et al.*, 2005 Steady-state  
843 transposon mutagenesis in inbred maize: Maize steady-state transposon mutagenesis.  
844 *Plant J.* 44: 52–61.
- 845 McCarty D. R., M. Suzuki, C. Hunter, J. Collins, W. T. Avigne, *et al.*, 2013 Genetic and  
846 molecular analyses of UniformMu transposon insertion lines. *Methods Mol. Biol.* 1057:  
847 157–166.
- 848 McCarty D. R., P. Liu, and K. E. Koch, 2018 The UniformMu Resource: Construction,  
849 Applications, and Opportunities, pp. 131–142 in *The Maize Genome*, edited by Bennetzen  
850 J., Flint-Garcia S., Hirsch C., Tuberosa R. Springer International Publishing, Cham.
- 851 Michel A. H., R. Hatakeyama, P. Kimmig, M. Arter, M. Peter, *et al.*, 2017 Functional mapping of  
852 yeast genomes by saturated transposition. *Elife* 6. <https://doi.org/10.7554/eLife.23570>
- 853 Monnahan P. J., J.-M. Michno, C. O'Connor, A. B. Brohammer, N. M. Springer, *et al.*, 2020  
854 Using multiple reference genomes to identify and resolve annotation inconsistencies. *BMC*  
855 *Genomics* 21: 281.
- 856 Oshlack A., M. D. Robinson, and M. D. Young, 2010 From RNA-seq reads to differential  
857 expression results. *Genome Biol.* 11: 220.
- 858 Østergaard L., and M. F. Yanofsky, 2004 Establishing gene function by mutagenesis in  
859 *Arabidopsis thaliana*. *Plant J.* 39: 682–696.
- 860 Parinov S., and V. Sundaresan, 2000 Functional genomics in Arabidopsis: large-scale  
861 insertional mutagenesis complements the genome sequencing project. *Curr. Opin.*  
862 *Biotechnol.* 11: 157–161.
- 863 Pooma W., C. Gersos, and E. Grotewold, 2002 Transposon insertions in the promoter of the  
864 *Zea mays* a1 gene differentially affect transcription by the Myb factors P and C1. *Genetics*  
865 161: 793–801.
- 866 Priyam A., B. J. Woodcroft, V. Rai, I. Moghul, A. Munagala, *et al.*, 2019 Sequenceserver: A  
867 Modern Graphical User Interface for Custom BLAST Databases. *Mol. Biol. Evol.* 36: 2922–  
868 2924.

- 869 Quinlan A. R., and I. M. Hall, 2010 BEDTools: a flexible suite of utilities for comparing genomic  
870 features. *Bioinformatics* 26: 841–842.
- 871 Rabinowicz P. D., K. Schutz, N. Dedhia, C. Jordan, L. D. Parnell, *et al.*, 1999 Differential  
872 methylation of genes and retrotransposons facilitates shotgun sequencing of the maize  
873 genome. *Nat. Genet.* 23: 305–308.
- 874 Raizada M. N., and V. Walbot, 2000 The late developmental pattern of Mu transposon excision  
875 is conferred by a cauliflower mosaic virus 35S -driven MURA cDNA in transgenic maize.  
876 *Plant Cell* 12: 5–21.
- 877 R Core Team, 2020 *R: A Language and Environment for Statistical Computing*. R Foundation  
878 for Statistical Computing, Vienna, Austria.
- 879 Robertson D. S., 1978 Characterization of a mutator system in maize. *Mutat. Res./Fundam.*  
880 *Mol. Mech. Mutag.* 51: 21–28.
- 881 Robertson D. S., 1983 A possible dose-dependent inactivation of mutator (Mu) in maize. *Mol.*  
882 *Gen. Genet.* 191: 86–90.
- 883 Schnable P. S., and P. A. Peterson, 1988 The Mutator-Related Cy Transposable Element of  
884 *Zea Mays* L. Behaves as a near-Mendelian Factor. *Genetics* 120: 587–596.
- 885 Settles A. M., A. Baron, A. Barkan, and R. A. Martienssen, 2001 Duplication and suppression of  
886 chloroplast protein translocation genes in maize. *Genetics* 157: 349–360.
- 887 Settles A. M., S. Latshaw, and D. R. McCarty, 2004 Molecular analysis of high-copy insertion  
888 sites in maize. *Nucleic Acids Res.* 32: e54.
- 889 Settles A. M., D. R. Holding, B. C. Tan, S. P. Latshaw, J. Liu, *et al.*, 2007 Sequence-indexed  
890 mutations in maize using the UniformMu transposon-tagging population. *BMC Genomics* 8:  
891 116.
- 892 Springer N. M., S. N. Anderson, C. M. Andorf, K. R. Ahern, F. Bai, *et al.*, 2018 The maize W22  
893 genome provides a foundation for functional genomics and transposon biology. *Nat. Genet.*  
894 <https://doi.org/10.1038/s41588-018-0158-0>
- 895 Stinard P. S., D. S. Robertson, and P. S. Schnable, 1993 Genetic Isolation, Cloning, and  
896 Analysis of a Mutator-Induced, Dominant Antimorph of the Maize amylose extender1  
897 Locus. *Plant Cell* 5: 1555–1566.
- 898 Strommer J. N., S. Hake, J. Bennetzen, W. C. Taylor, and M. Freeling, 1982 Regulatory  
899 mutants of the maize *Adh1* gene caused by DNA insertions. *Nature* 300: 542–544.
- 900 Tadege M., P. Ratet, and K. S. Mysore, 2005 Insertional mutagenesis: a Swiss Army knife for  
901 functional genomics of *Medicago truncatula*. *Trends Plant Sci.* 10: 229–235.
- 902 Tan B.-C., Z. Chen, Y. Shen, Y. Zhang, J. Lai, *et al.*, 2011 Identification of an active new  
903 mutator transposable element in maize. *G3* 1: 293–302.
- 904 Taylor L. P., and V. Walbot, 1987 Isolation and characterization of a 1.7-kb transposable

- 905 element from a mutator line of maize. *Genetics* 117: 297–307.
- 906 Thibault S. T., M. A. Singer, W. Y. Miyazaki, B. Milash, N. A. Dompe, *et al.*, 2004 A  
907 complementary transposon tool kit for *Drosophila melanogaster* using P and piggyBac.  
908 *Nat. Genet.* 36: 283–287.
- 909 Vollbrecht E., J. Duvick, J. P. Schares, K. R. Ahern, P. Deewatthanawong, *et al.*, 2010 Genome-  
910 wide distribution of transposed Dissociation elements in maize. *Plant Cell* 22: 1667–1685.
- 911 Walbot V., 1991 The Mutator Transposable Element Family of Maize, pp. 1–37 in *Genetic*  
912 *Engineering: Principles and Methods*, edited by Setlow J. K. Springer US, Boston, MA.
- 913 Walbot V., and G. N. Rudenko, 2002 *MuDR/Mu* Transposable Elements of Maize, pp. 533–564  
914 in *Mobile DNA II*, edited by Craig N. L., Craigie R., Gellert M., Lambowitz A. M. ASM Press,  
915 Washington D.C.
- 916 Williams-Carrier R., N. Stiffler, S. Belcher, T. Kroeger, D. B. Stern, *et al.*, 2010 Use of Illumina  
917 sequencing to identify transposon insertions underlying mutant phenotypes in high-copy  
918 Mutator lines of maize: Illumina-HTS identification of Mu tagged genes. *Plant J.* 152: no-  
919 no.
- 920 Zhou P., C. N. Hirsch, S. P. Briggs, and N. M. Springer, 2019 Dynamic Patterns of Gene  
921 Expression Additivity and Regulatory Variation throughout Maize Development. *Mol. Plant*  
922 12: 410–425.
- 923 Zhu J., S. M. Kaeppler, and J. P. Lynch, 2005 Mapping of QTL controlling root hair length in  
924 maize (*Zea mays* L.) under phosphorus deficiency. *Plant Soil* 270: 299–310.

925 **Figure 1. Schematic of *Mutator* insertion locations for 35 UniformMu mutants.** The W22  
926 gene models are indicated by different colors/shapes to represent UTRs, coding sequence and  
927 introns. The UTRs and CDS' for each gene model are scaled proportionally, but introns are not  
928 to scale. *Mu* transposon insertions are indicated by red triangles and independent mutant alleles  
929 from the same gene are depicted by numbers. The *BSD10* (*Zm00004b040474*) gene model is  
930 based on the B73v4 (*Zm00001d026518*) gene annotation due to a fused gene annotation in  
931 W22.

932  
933 **Figure 2. Potential *Mu* insertion allele transcript structures. A)** Schematic of 5 mutant  
934 transcript structures that could result from a *Mu* transposon insertion. Potential transcripts  
935 include: a transcript with gene sequences 5' and 3' of the *Mu* insertion and all or a portion of *Mu*  
936 retained (*Mu* read-through), a transcript with sequence 5' and 3' of the *Mu* insertion and partial  
937 *Mu* sequence retained due to alternative splicing (*Mu* spliced), a partial transcript initiating at the  
938 gene TSS and terminating in *Mu* (gene TSS-*Mu*), a partial transcript initiating within *Mu* and  
939 reading through the 3' gene sequence (*Mu* TSS), or both the gene TSS-*Mu* and *Mu* TSS  
940 transcripts. **B)** Schematic of RT-PCR primer design to test for *Mu* read-through and *Mu* spliced  
941 transcripts with gene specific primers (F and R) flanking the annotated *Mu* insertion site in  
942 mutant and wild-type alleles. A larger PCR product will be amplified in the mutant allele relative  
943 to wild-type if all or a portion of *Mu* is retained. No product will be amplified in the mutant if there  
944 are transcripts initiating or terminating in *Mu*. **C)** RT-PCR gels of gene-specific primers flanking  
945 *Mu* for at least two biological replicates of 3 mutant and wild-type alleles. All three alleles lack  
946 mutant cDNA amplification relative to wild-type.  
947

948 **Figure 3. Schematic of *de novo* transcript assemblies for 33 mutant alleles. A)** Mutant  
949 allele transcripts are referenced relative to the sequences 5' and 3' of the *Mu* insertion. No full-  
950 length transcripts with retained *Mu* sequences were identified. The observed transcripts could  
951 include separate transcripts representing gene sequences both 5' and 3' of the *Mu* insertion or  
952 sequences only 5' or 3' of *Mu*. We also identified some examples of transcripts with partial  
953 regions of retained *Mu* sequence. The observations were grouped into 6 transcript structure  
954 types that are illustrated with schematics and the total number of alleles for each type is  
955 indicated. Transcripts depicted as partial are truncated but contain no *Mu* sequence. **B)** The  
956 specific transcripts that are observed for two of the mutant alleles are shown in detail. The wild-  
957 type transcript assembly is shown to indicate we recovered the annotated wild-type cDNA with  
958 our short-read assembly. Both *jmj13-m4* and *sbp20-m2* have evidence for two transcripts  
959 assembled, one transcript initiating at the gene TSS with premature termination in *Mu* (gene  
960 TSS-*Mu*, 5' of *Mu*) and the other initiating within *Mu* and reading through the 3' end of the gene  
961 (*Mu* TSS, 3' of *Mu*). Unmapped indicates assembled sequence that could not be annotated as  
962 *Mu* or gene sequence. All *de novo* transcripts were assembled with TRINITY.

963  
964 **Figure 4. Assessment of *Mu* element identity and orientation.** The *Mu* sequence from the  
965 *de novo* assembled transcripts (highlighted in red in the schematic) was aligned to  
966 representative *Mu* element sequences (element identity indicated to the right of the plots). The  
967 left panel shows alignments of the *Mu* sequence from the transcript initiated at the gene TSS  
968 while the right panel shows alignments of *Mu* sequence from *Mu* TSS initiated transcripts that  
969 include the 3' portion of the gene. Mutant alleles are grouped by the *Mu* element with the  
970 greatest sequence similarity to the transcript assembled *Mu* sequence and the plots indicate the  
971 position of the aligned sequence within the *Mu* element. *Mu1* and *Mu1.7* are plotted together  
972 due to sequence similarity between TIR regions. The *Mu* sequence segments are colored by the  
973 alignment position relative to *Mu* element features: 5' TIR (blue), internal sequence (green), and  
974 3' TIR (gold). The base pair coordinates listed in each plot indicate the TIR boundaries.

975  
976 **Figure 5. Definition of transcript boundaries using RT-PCR method. A)** A schematic of how  
977 RT-PCR primers were designed to test the extent of the transcribed *Mu* sequence relative to the  
978 predictions of the mutant allele transcript assemblies. Multiple *Mu* primers were designed with  
979 specificity to either the 5' or 3' regions of each *Mu* element tested by RT-PCR. For each mutant  
980 allele, some *Mu* primers were designed to be located within the transcriptome assembly and  
981 some were designed for more internal regions of the *Mu* element. All primer-sets used for RT-  
982 PCR were first tested and confirmed to amplify mutant genomic DNA. **B)** A graphic  
983 representation of the RT-PCR results is shown. For each mutant allele, transcripts are  
984 categorized as gene TSS-*Mu* or *Mu* TSS with opposite orientations to mirror Figure 5A and  
985 alleles are ordered by *Mu* element identity. The numbers on the x-axis indicate *Mu* sequence  
986 length (bp) where each primer binds. Brown indicates *Mu* sequence regions expected to amplify  
987 based on the transcript assembly with the length of *Mu* sequence (bp) listed adjacent. Tan  
988 represents which primers successfully amplified products by RT-PCR. Pink indicates the first  
989 *Mu*-specific primer used that resulted in absence of amplification by RT-PCR and is the region  
990 where the transcript terminates. Black indicates absence of amplification by RT-PCR for *Mu*  
991 sequence that is more internal to the region where the transcript terminates (Blank). Absence or  
992 presence of amplification was confirmed by at least two biological replicates.

993  
994 **Figure 6. Transcript abundance comparison of mutant and wild-type transcripts. A)**  
995 Schematic of how the expression level of the mutant and wild-type transcripts could be directly  
996 compared. Exon regions that are present in both the mutant and wild-type transcript assemblies  
997 were identified for each *Mu* allele. Transcript abundance (CPM/fragment) for mutant and wild-  
998 type transcripts was calculated from counts of the corresponding RNA-seq sample reads that



999 map to these shared exon regions. A scatter plot of mutant transcript abundance (y-axis  
1000 coordinates) relative to W22 wild-type transcript abundance (x-axis coordinates) for **B**) gene  
1001 TSS partial transcripts, including transcripts with termination in *Mu*, from 18 mutant alleles and  
1002 **C**) *Mu* TSS transcripts from 19 mutant alleles. Alleles are colored by the distance in bp of the  
1003 *Mu* insertion from the gene annotated TSS: 0-100 (black), 201-500 (pink), 501-1000 (purple), >  
1004 1000 (blue). The lines show the expectation if there was equivalent expression for both alleles  
1005 (slope = 1). Transcript abundance values for four mutant transcripts (*mybr32-m1*, *gras75-m1*  
1006 and *wrky82-m1* gene TSS partial transcripts and *baf60.21-m1* *Mu* TSS transcript) are not shown  
1007 in these plots due to either mutant and/or wild-type abundance > 40 CPM. However,  $R^2$  values  
1008 were calculated for each transcript abundance comparison from all 18 gene TSS partial  
1009 transcripts and 19 *Mu* TSS transcripts.  
1010

1011 **Figure 7. Tissue-specific patterns of expression for mutant transcripts relative wild-type**  
1012 **transcripts from RT-qPCR data. A)** Schematic of RT-qPCR primer design to test relative  
1013 patterns of gene expression from mutant and wild-type alleles. Primers with specificity to  
1014 regions of shared sequence between assembled wild-type and mutant transcripts were used to  
1015 quantify tissue-specific expression patterns by RT-qPCR. 10 mutant alleles isolated from 5  
1016 genes were selected to sample for this analysis. Selecting genes with two independent mutant  
1017 alleles each provided more power to confirm relative wild-type gene expression patterns across  
1018 tissues and we focused on genes with variable expression levels in the tissues sampled. **B)**  
1019 Average delta Ct (dCt) values of mutant gene TSS-*Mu* transcripts (blue) and mutant *Mu* TSS  
1020 transcripts (red) relative to the values of their corresponding wild-type transcripts (black) are  
1021 plotted as points each tissue sampled (x-axis tissue order is the same for all alleles). The gene  
1022 TSS transcript for *wrky8-m2* is a gene TSS partial transcript. Each data point is the average dCt  
1023 value of three biological replicates each with three technical replicates. Trendlines across  
1024 tissues are plotted to display expression patterns. dCt values are inversely proportional to  
1025 relative transcript abundance and greater dCt values indicate lower relative transcript  
1026 abundance.  
1027

1028  
1029 **Figure S1. Visualization of wild-type W22 and mutant allele RNA-seq read coverage for**  
1030 **three genes.**  
1031

1032 **Figure S2. Determination of Mu element identity and orientation by PCR using Mu**  
1033 **element specific primers.**  
1034

1035 **Figure S3. Analysis of RNA-seq read orientation between wild-type W22 and the mutant**  
1036 **allele for two genes.**  
1037

1038 **Figure S4. Ratios of mutant to wild-type transcript abundance.**  
1039

1040 **Table S1. 35 *Mutator* mutant alleles isolated from the UniformMu population in maize.**  
1041

1042 **Table S2. Gene expression values for 24 transcription factor genes in different tissues.**  
1043

1044 **Table S3. Mutant allele *Mu* element identity and orientation by gDNA PCR.**  
1045

1046 **Table S4. Mutant allele transcript boundaries and potential for *Mu* read-through tested by**  
1047 **RT-PCR.**  
1048

1049 **Table S5. Transcript abundance for shared exon sequence between mutant and wild type**

1050 **transcripts.**

1051

1052 **Table S6. Tissue-specific expression patterns for mutant and wild type W22 transcripts**

1053 **tested by RT-qPCR.**

1054

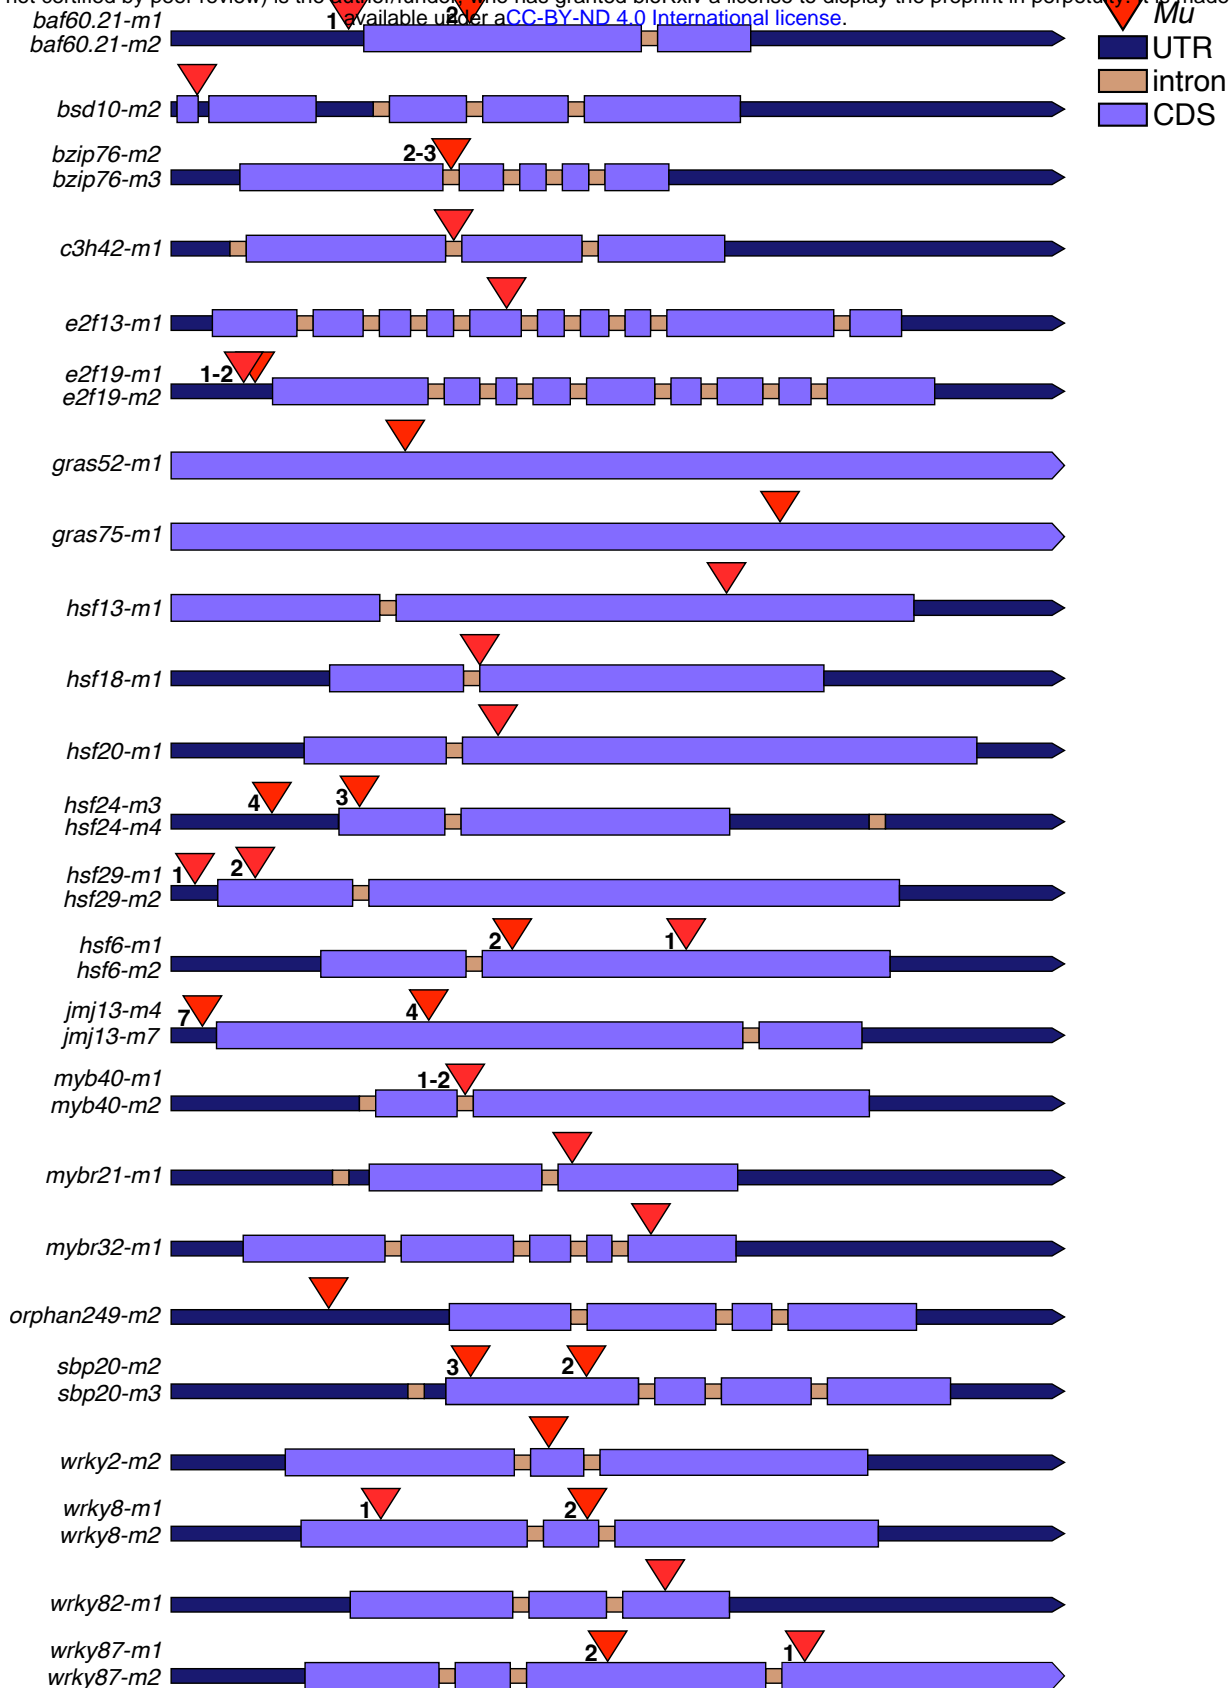

**Figure 1. Schematic of *Mutator* insertion locations for 35 UniformMu mutants.** The W22 gene models are indicated by different colors/shapes to represent UTRs, coding sequence and introns. The UTRs and CDS' for each gene model are scaled proportionally, but introns are not to scale. *Mu* transposon insertions are indicated by red triangles and independent mutant alleles from the same gene are depicted by numbers. The *BSD10* (*Zm00004b040474*) gene model is based on the B73v4 (*Zm00001d026518*) gene annotation due to a fused gene annotation in W22.

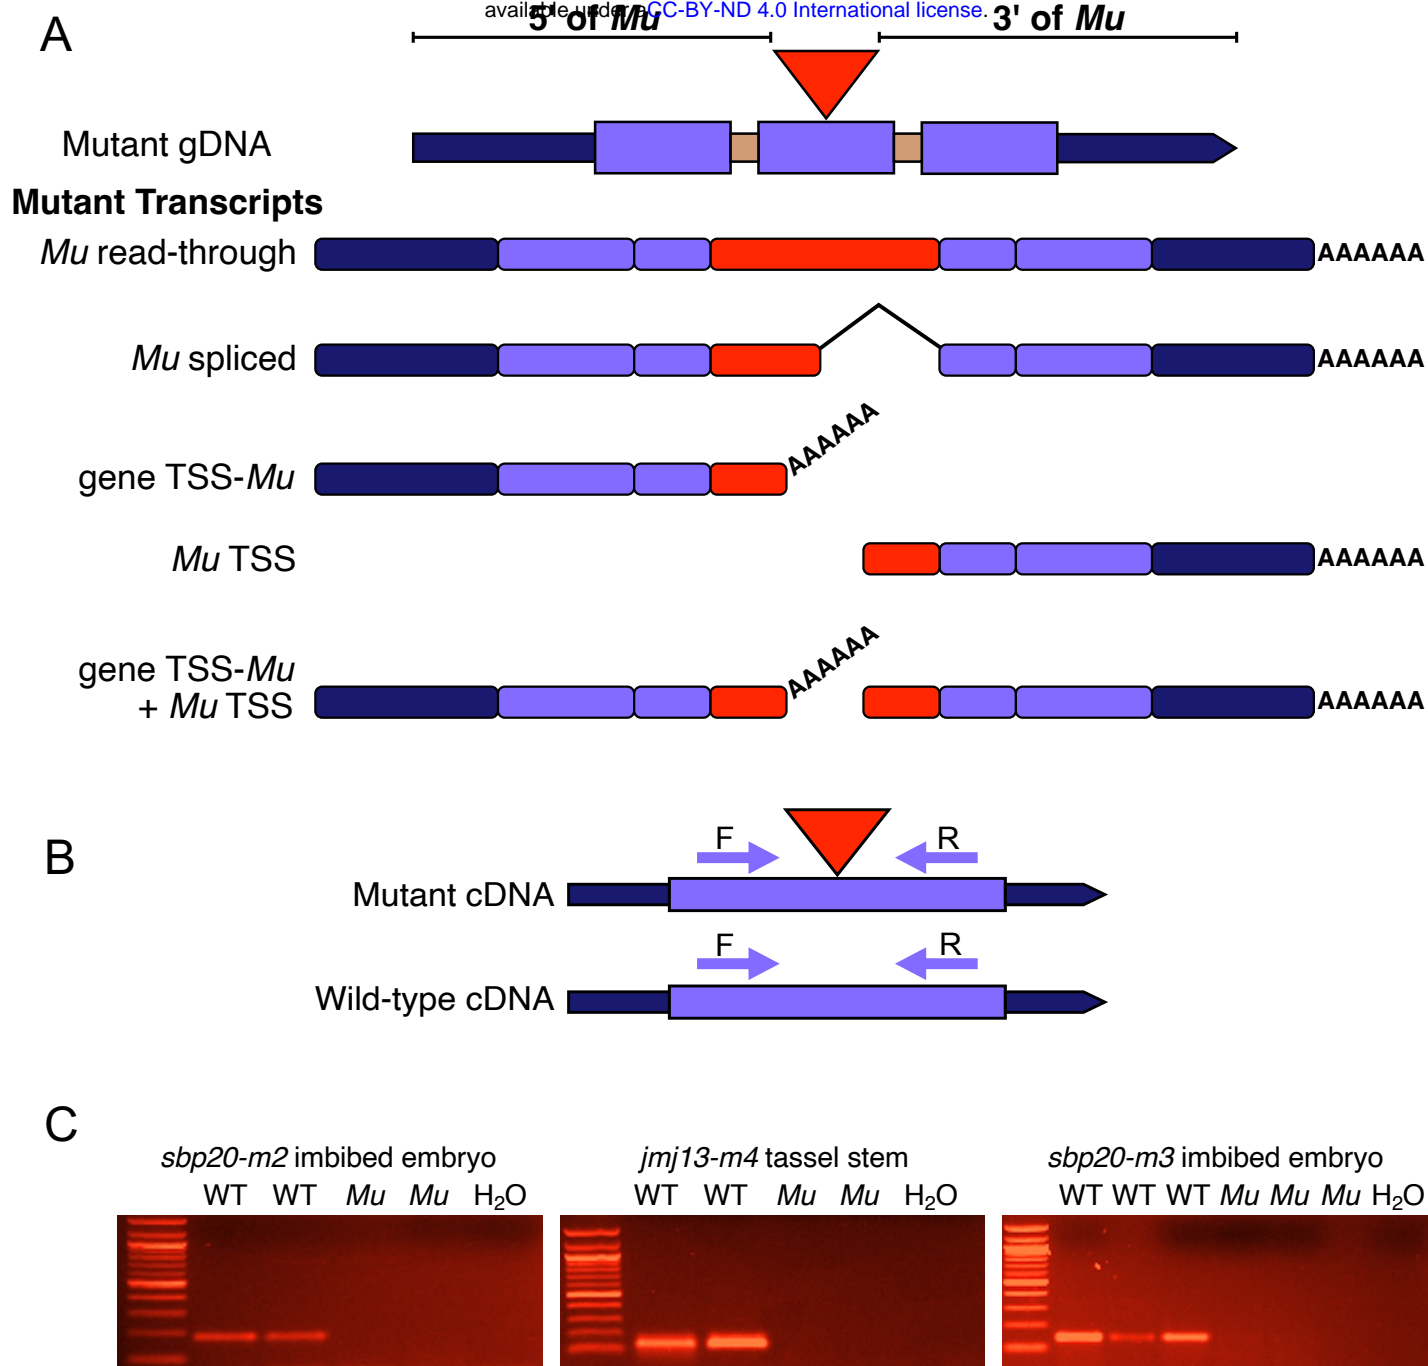

**Figure 2. Potential *Mu* insertion allele transcript structures.** **A)** Schematic of 5 mutant transcript structures that could result from a *Mu* transposon insertion. Potential transcripts include: a transcript with gene sequences 5' and 3' of the *Mu* insertion and all or a portion of *Mu* retained (*Mu* read-through), a transcript with sequence 5' and 3' of the *Mu* insertion and partial *Mu* sequence retained due to alternative splicing (*Mu* spliced), a partial transcript initiating at the gene TSS and terminating in *Mu* (gene TSS-*Mu*), a partial transcript initiating within *Mu* and reading through the 3' gene sequence (*Mu* TSS), or both the gene TSS-*Mu* and *Mu* TSS transcripts. **B)** Schematic of RT-PCR primer design to test for *Mu* read-through and *Mu* spliced transcripts with gene specific primers (F and R) flanking the annotated *Mu* insertion site in mutant and wild-type alleles. A larger PCR product will be amplified in the mutant allele relative to wild-type if all or a portion of *Mu* is retained. No product will be amplified in the mutant if there are transcripts initiating or terminating in *Mu*. **C)** RT-PCR gels of gene-specific primers flanking *Mu* for at least two biological replicates of 3 mutant and wild-type alleles. All three alleles lack mutant cDNA amplification relative to wild-type.

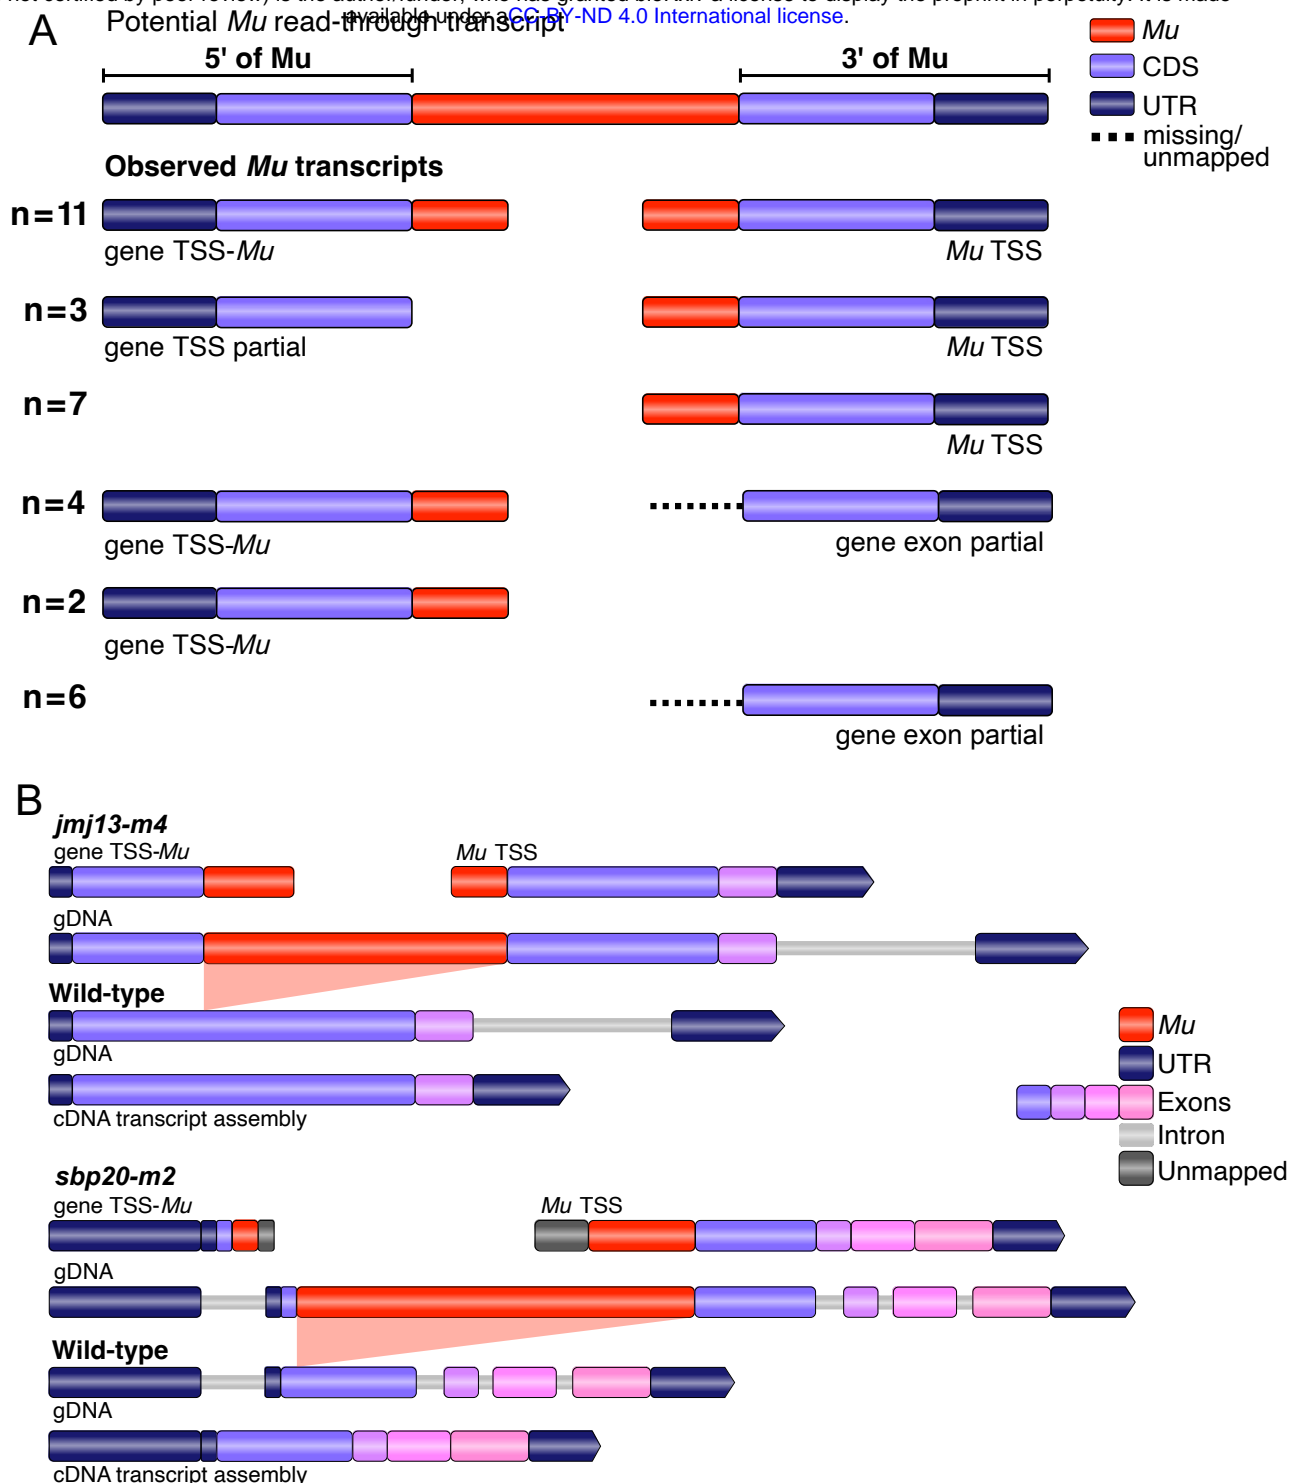

**Figure 3. Schematic of *de novo* transcript assemblies for 33 mutant alleles. A)** Mutant allele transcripts are referenced relative to the sequences 5' and 3' of the *Mu* insertion. No full-length transcripts with retained *Mu* sequences were identified. The observed transcripts could include separate transcripts representing gene sequences both 5' and 3' of the *Mu* insertion or sequences only 5' or 3' of *Mu*. We also identified some examples of transcripts with partial regions of retained *Mu* sequence. The observations were grouped into 6 transcript structure types that are illustrated with schematics and the total number of alleles for each type is indicated. Transcripts depicted as partial are truncated but contain no *Mu* sequence. **B)** The specific transcripts that are observed for two of the mutant alleles are shown in detail. The wild-type transcript assembly is shown to indicate we recovered the annotated wild-type cDNA with our short-read assembly. Both *jmj13-m4* and *sbp20-m2* have evidence for two transcripts assembled, one transcript initiating at the gene TSS with premature termination in *Mu* (gene TSS-*Mu*, 5' of *Mu*) and the other initiating within *Mu* and reading through the 3' end of the gene (*Mu* TSS, 3' of *Mu*). Unmapped indicates assembled sequence that could not be annotated as *Mu* or gene sequence. All *de novo* transcripts were assembled with TRINITY.

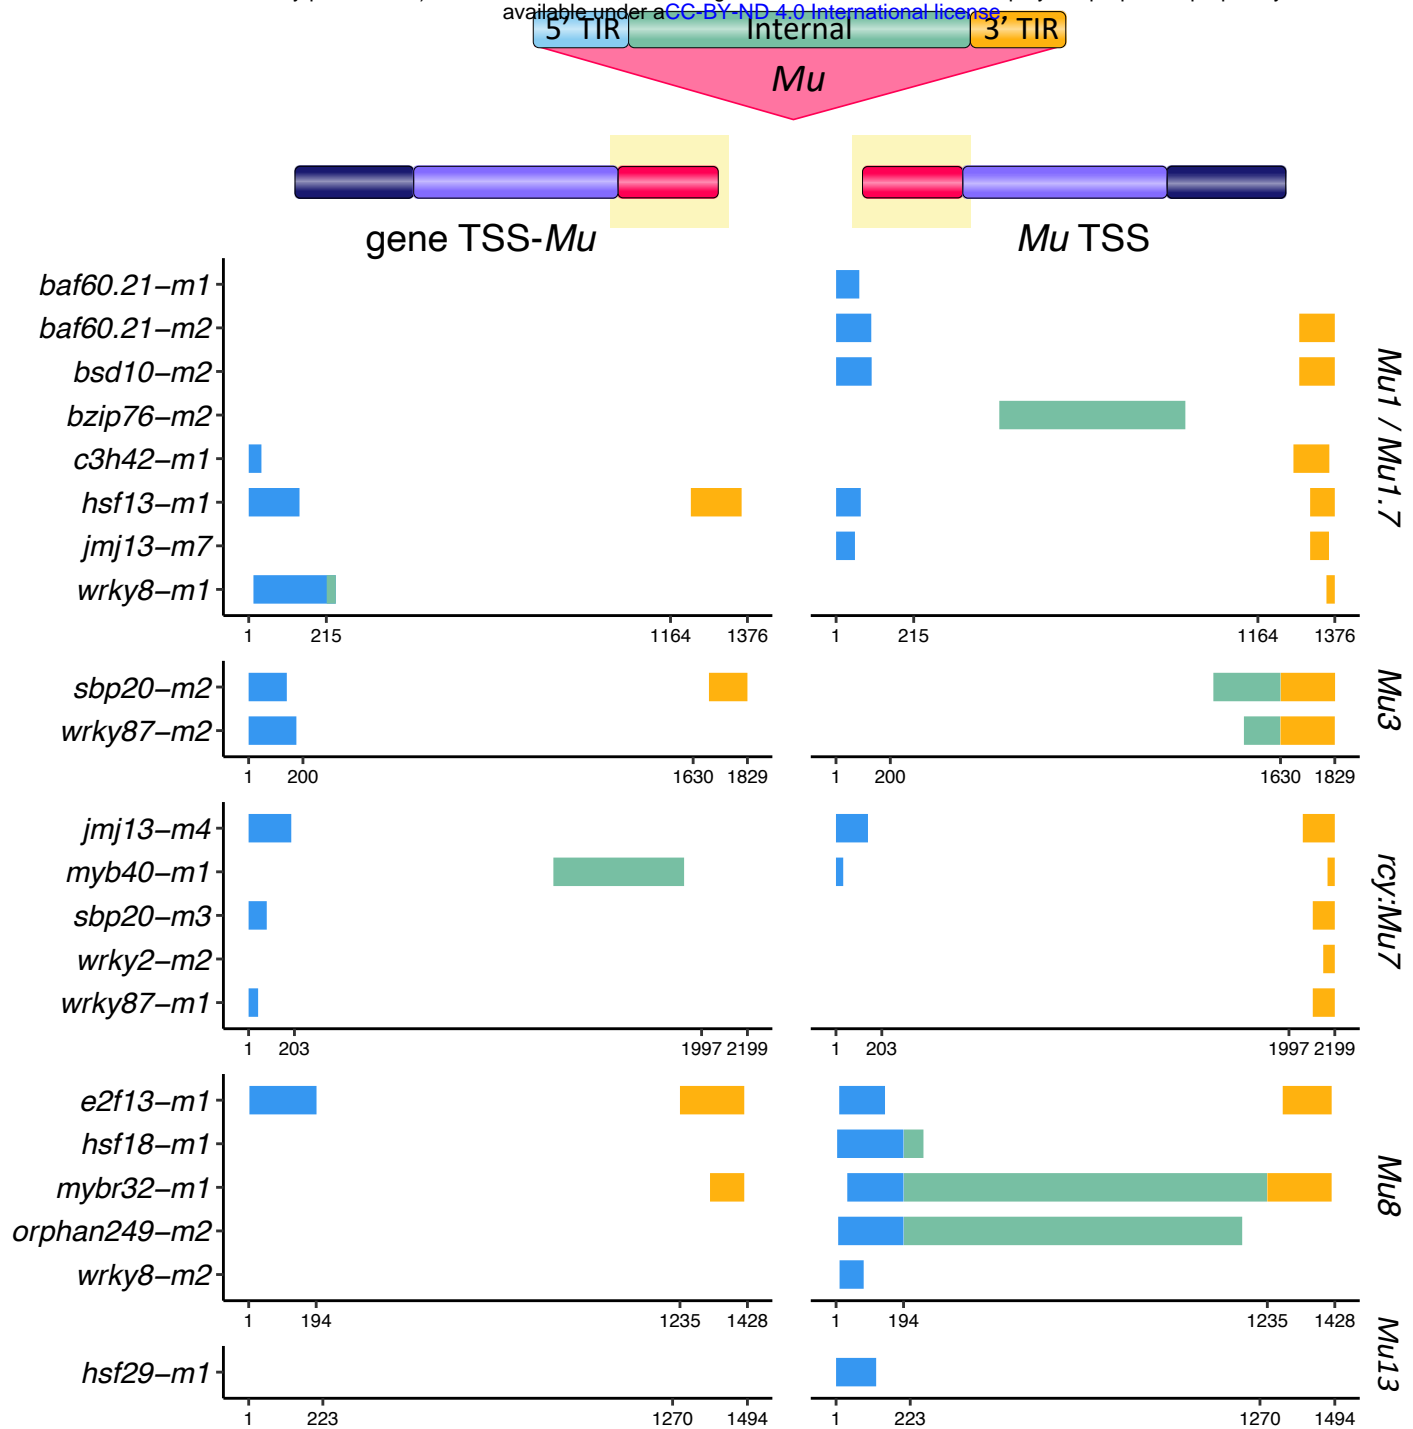

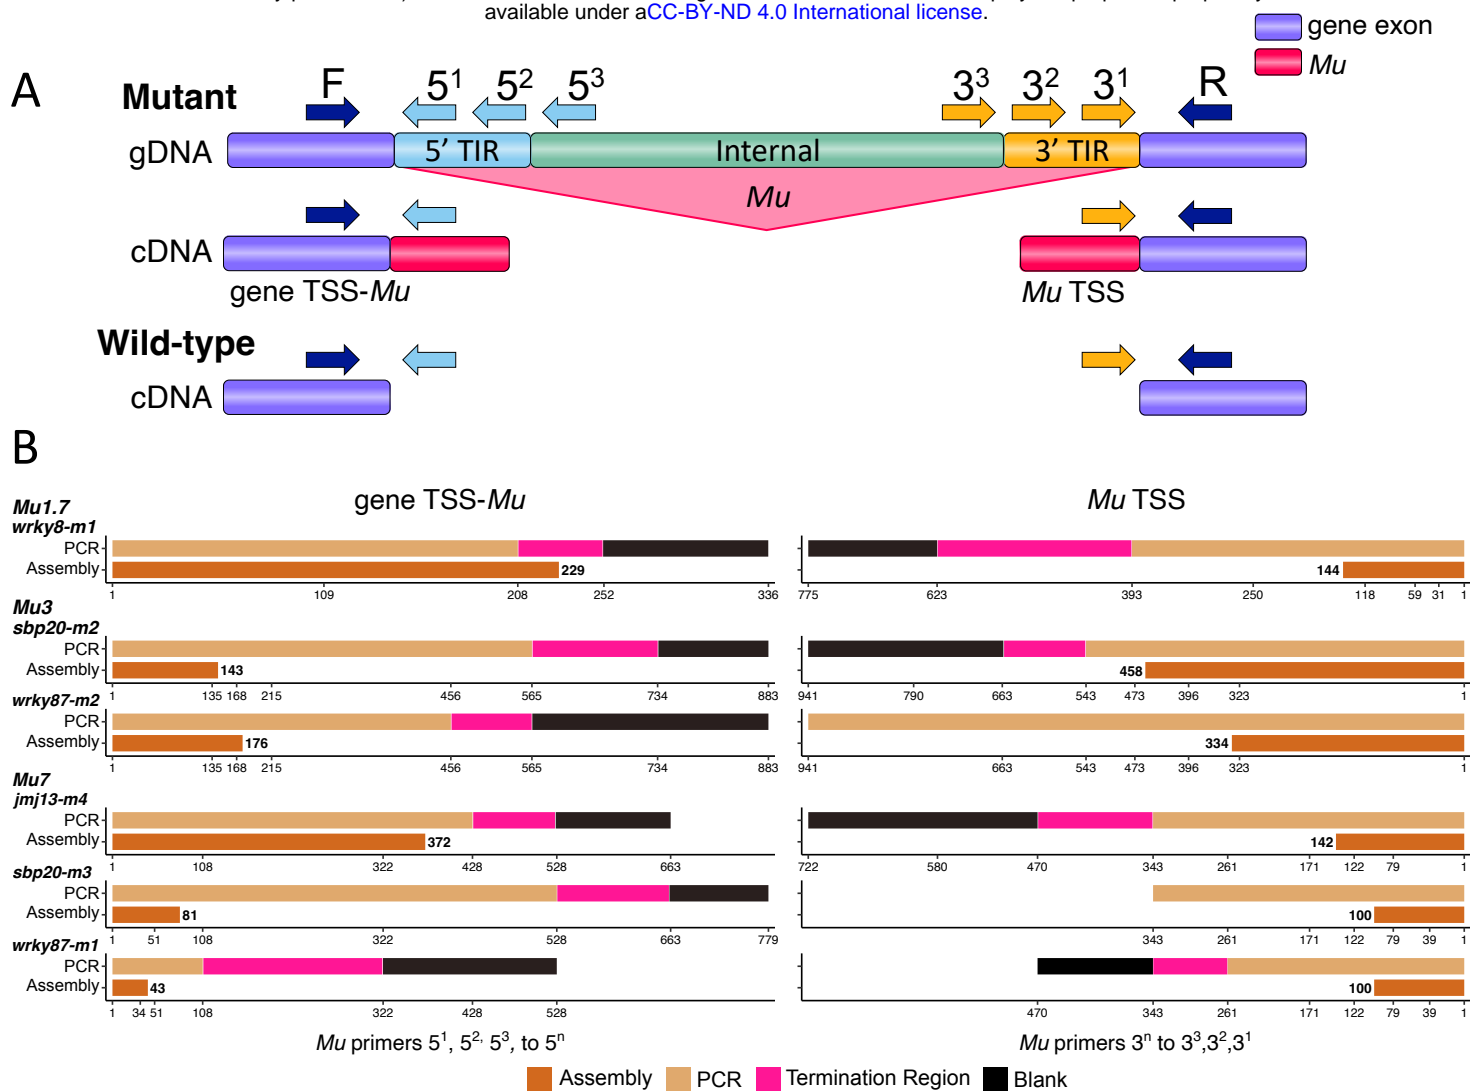

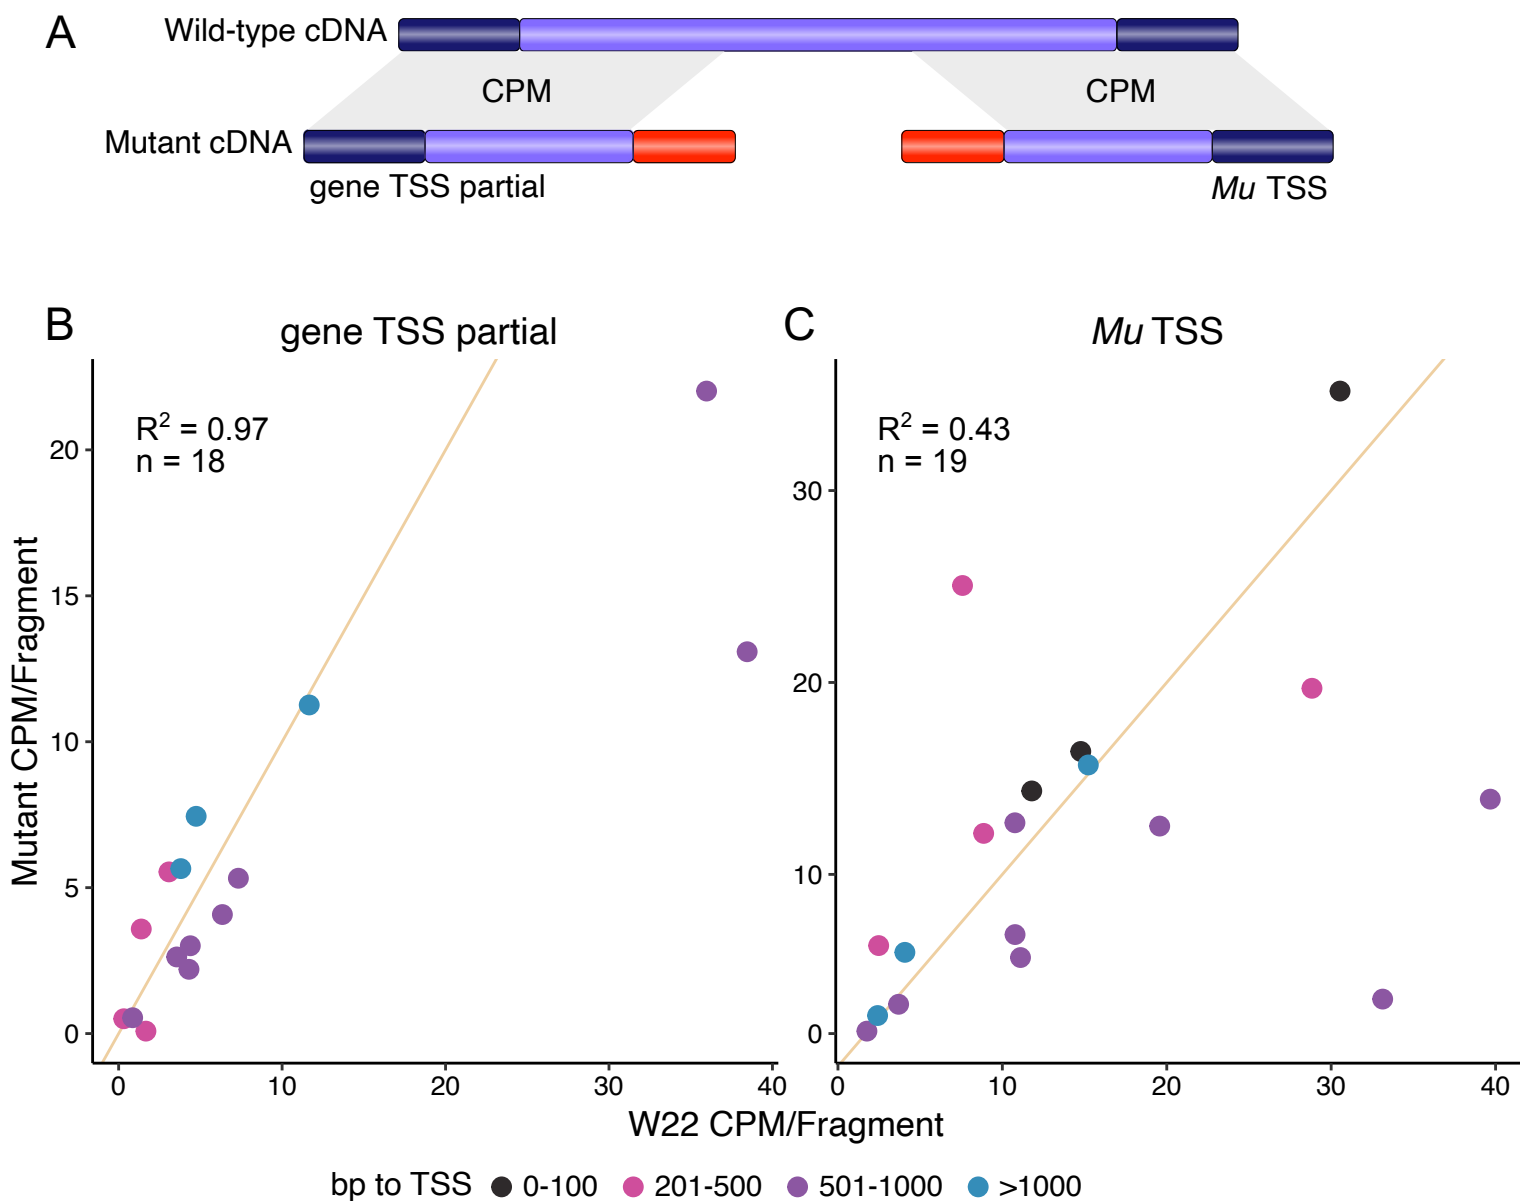

**Figure 6. Transcript abundance comparison of mutant and wild-type transcripts.** **A)** Schematic of how the expression level of the mutant and wild-type transcripts could be directly compared. Exon regions that are present in both the mutant and wild-type transcript assemblies were identified for each *Mu* allele. Transcript abundance (CPM/fragment) for mutant and wild-type transcripts was calculated from counts of the corresponding RNA-seq sample reads that map to these shared exon regions. A scatter plot of mutant transcript abundance (y-axis coordinates) relative to W22 wild-type transcript abundance (x-axis coordinates) for **B)** gene TSS partial transcripts, including transcripts with termination in *Mu*, from 18 mutant alleles and **C)** *Mu* TSS transcripts from 19 mutant alleles. Alleles are colored by the distance in bp of the *Mu* insertion from the gene annotated TSS: 0-100 (black), 201-500 (pink), 501-1000 (purple), > 1000 (blue). The lines show the expectation if there was equivalent expression for both alleles (slope = 1). Transcript abundance values for four mutant transcripts (*mybr32-m1*, *gras75-m1* and *wrky82-m1* gene TSS partial transcripts and *baf60.21-m1* *Mu* TSS transcript) are not shown in these plots due to either mutant and/or wild-type abundance > 40 CPM. However,  $R^2$  values were calculated for each transcript abundance comparison from all 18 gene TSS partial transcripts and 19 *Mu* TSS transcripts.



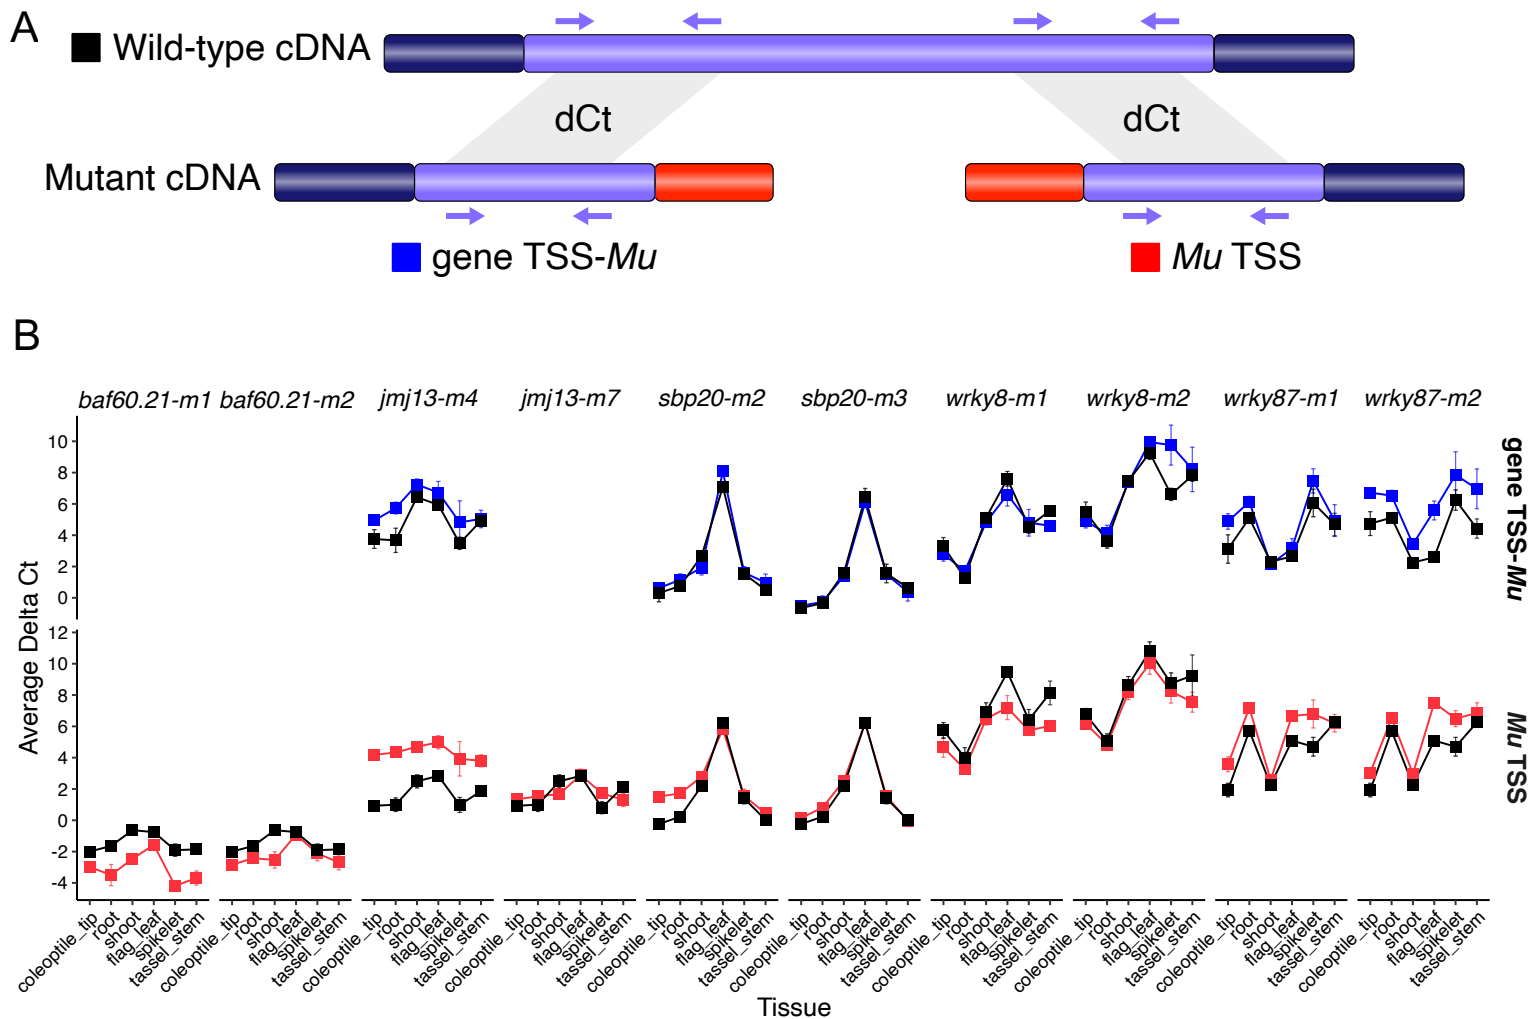

**Figure 7. Tissue-specific patterns of expression for mutant transcripts relative wild-type transcripts from RT-qPCR data.** **A)** Schematic of RT-qPCR primer design to test relative patterns of gene expression from mutant and wild-type alleles. Primers with specificity to regions of shared sequence between assembled wild-type and mutant transcripts were used to quantify tissue-specific expression patterns by RT-qPCR. 10 mutant alleles isolated from 5 genes were selected to sample for this analysis. Selecting genes with two independent mutant alleles each provided more power to confirm relative wild-type gene expression patterns across tissues and we focused on genes with variable expression levels in the tissues sampled. **B)** Average delta Ct (dCt) values of mutant gene TSS-Mu transcripts (blue) and mutant Mu TSS transcripts (red) relative to the values of their corresponding wild-type transcripts (black) are plotted as points each tissue sampled (x-axis tissue order is the same for all alleles). The gene TSS transcript for *wrky8-m2* is a gene TSS partial transcript. Each data point is the average dCt value of three biological replicates x three technical replicates. Trendlines across tissues are plotted to display expression patterns. dCt values are inversely proportional to relative transcript abundance and greater dCt values indicate lower relative transcript abundance.
